# Supplementary material for: Patterns of genomic and phenomic diversity in wine and table grapes
Source: PubMed Central journal article supplement (PMC5539807; doi:10.1038/hortres.2017.35), 2017-08-02

berry length 2008 (N = 465)

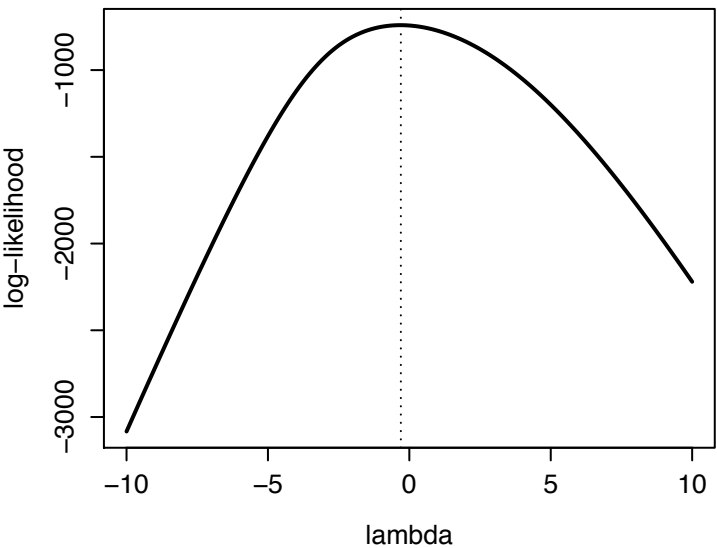

Untransformed

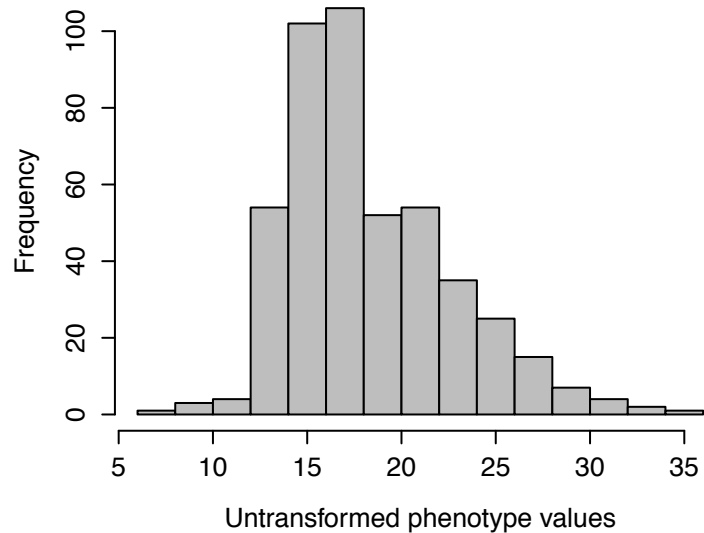

Transformed with lambda = -0.3

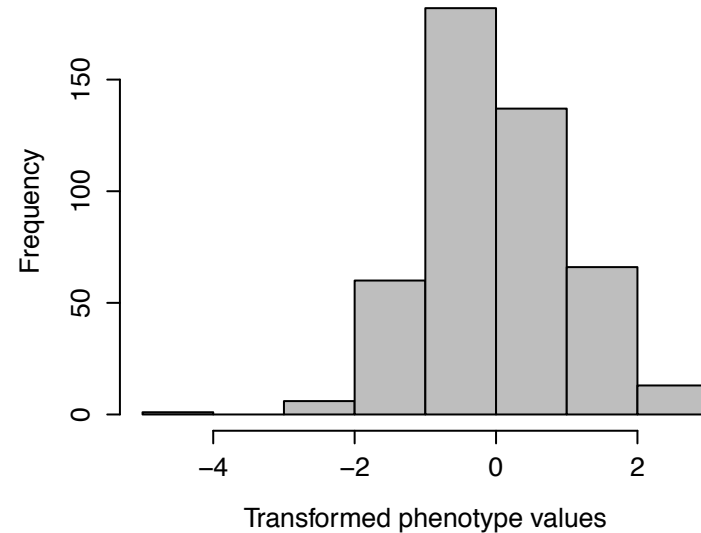

QQ plot untransformed

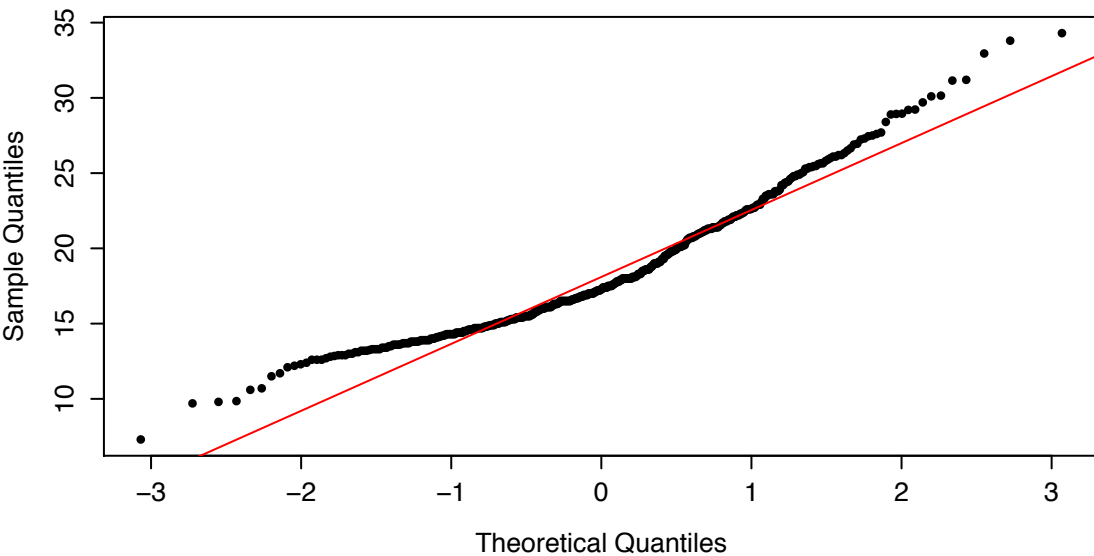

QQ plot transformed

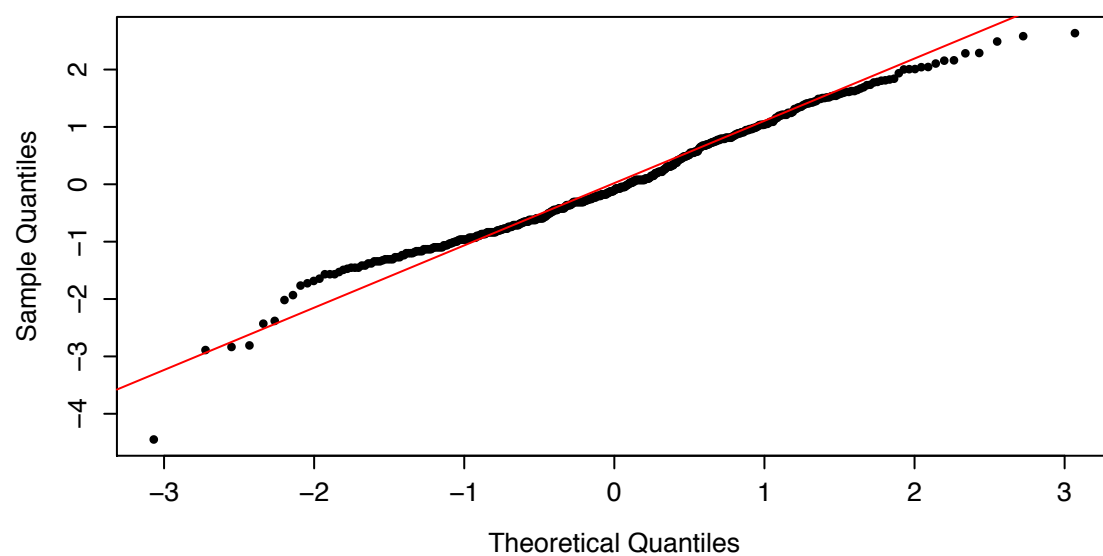

berry shape 2008 (N = 465)

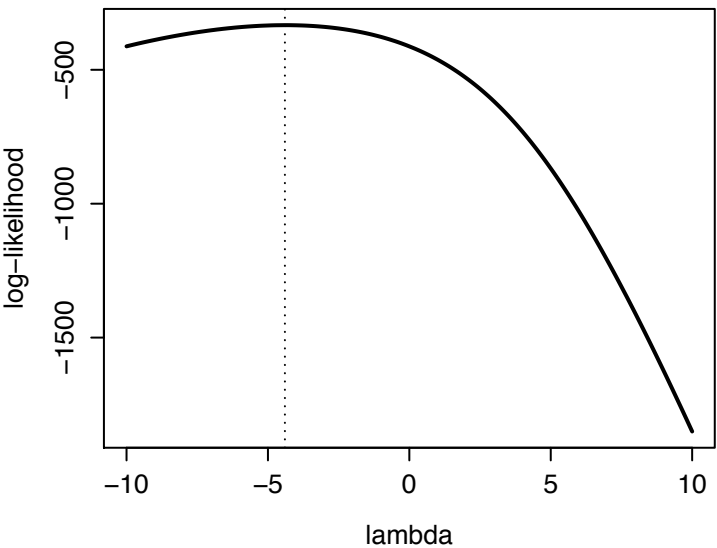

Untransformed

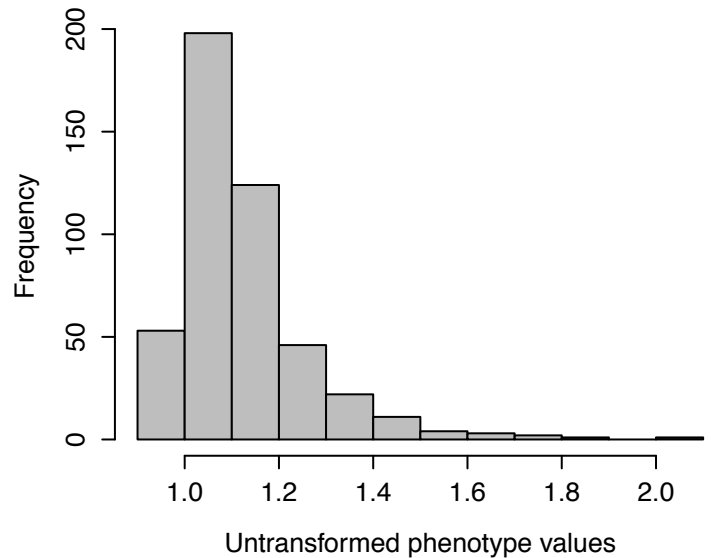

Transformed with lambda = -4.4

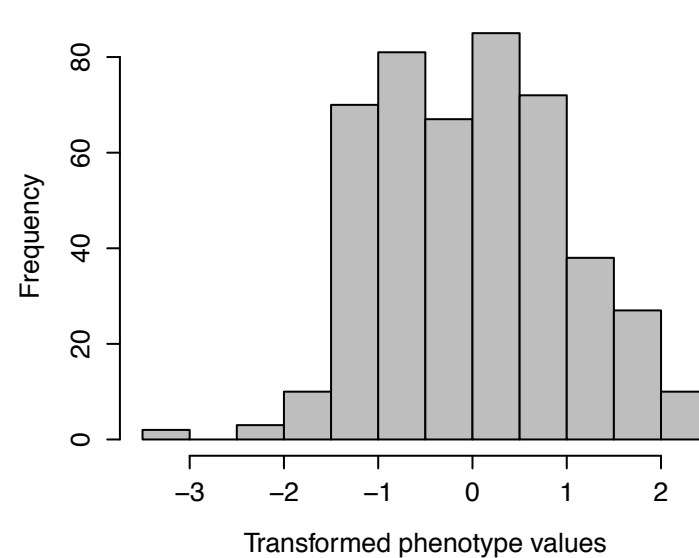

QQ plot untransformed

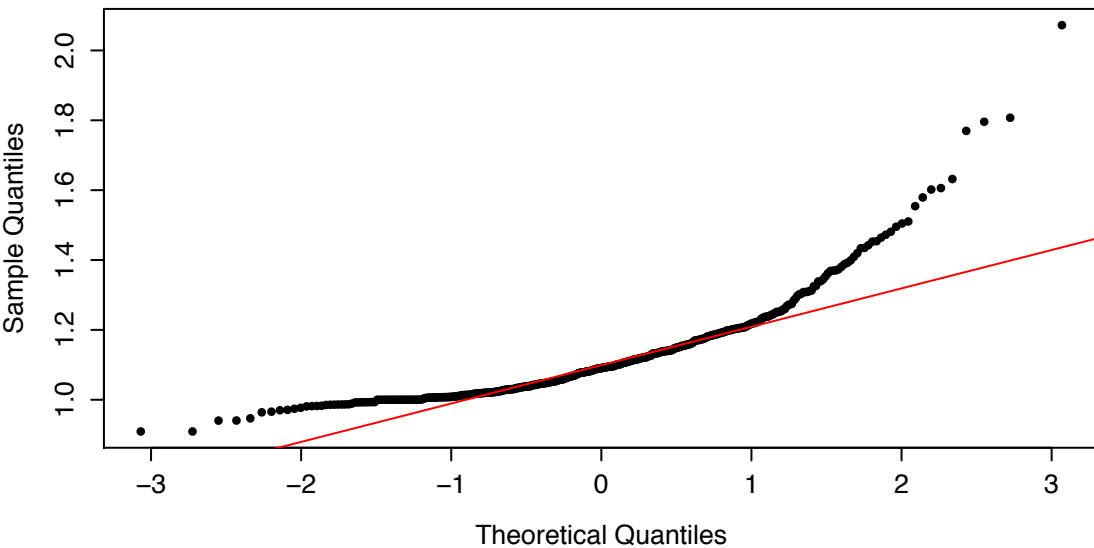

QQ plot transformed

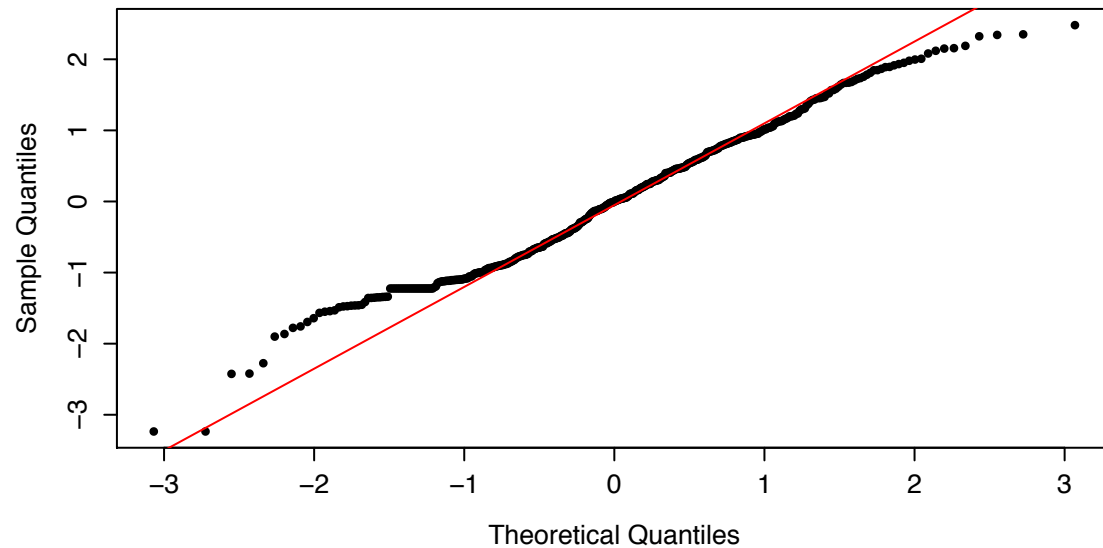

berry size 2008 (N = 465)

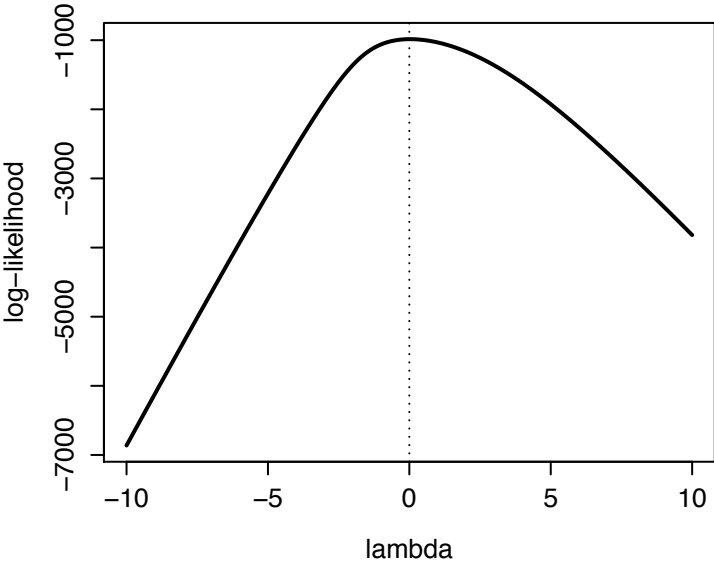

Untransformed

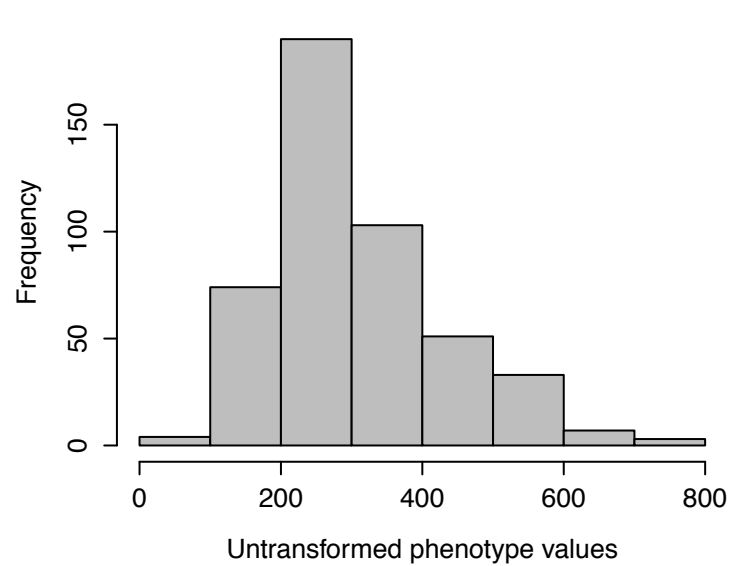

Transformed with lambda = 0

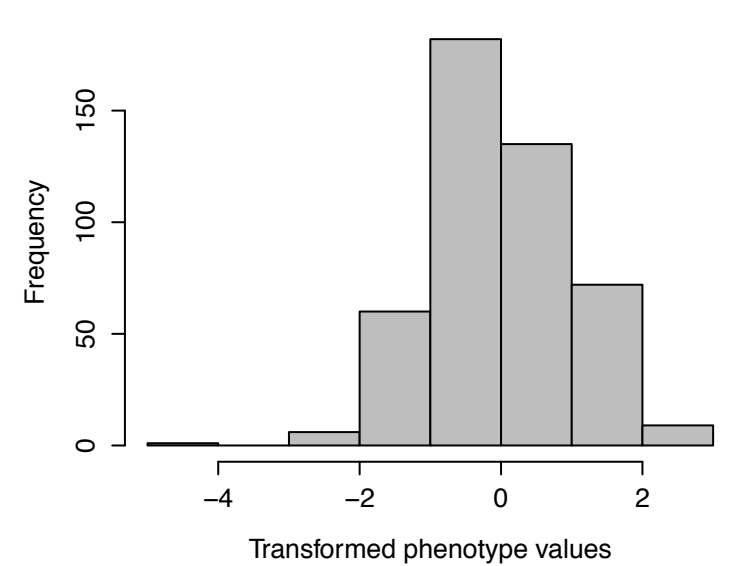

QQ plot untransformed

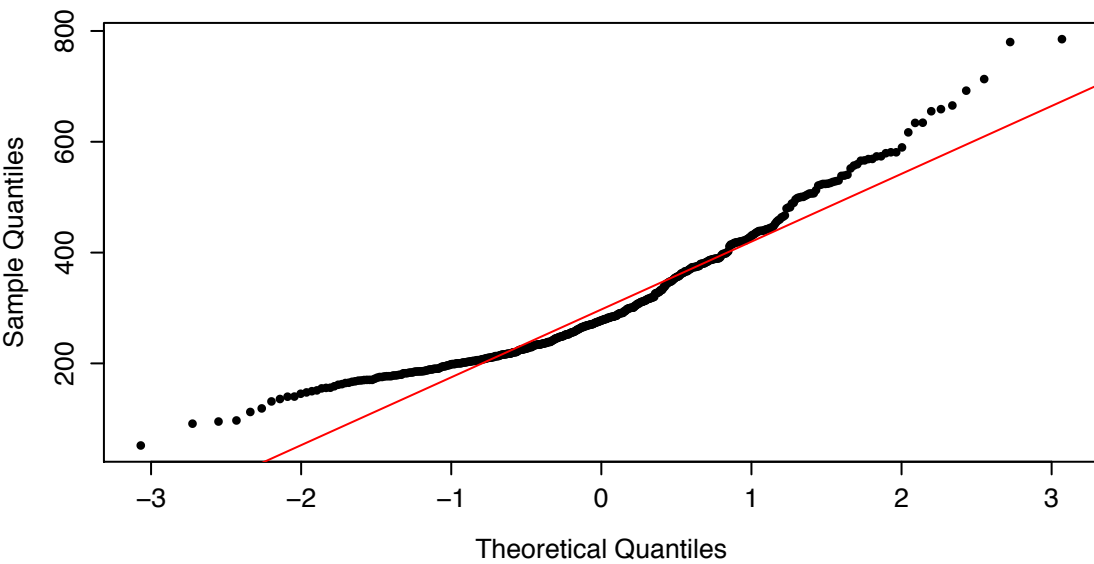

QQ plot transformed

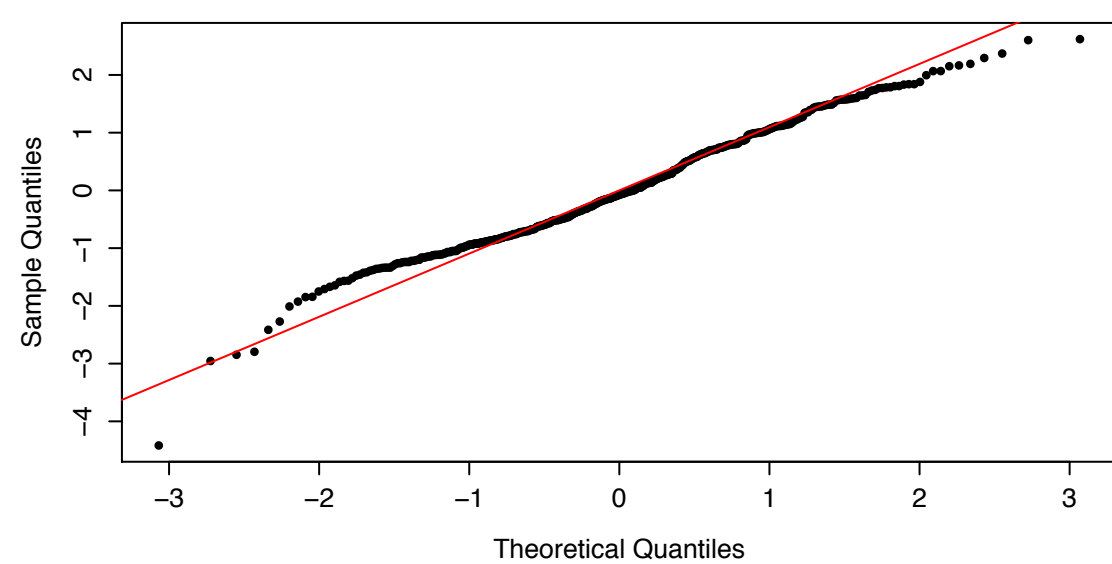

berry width 2008 (N = 465)

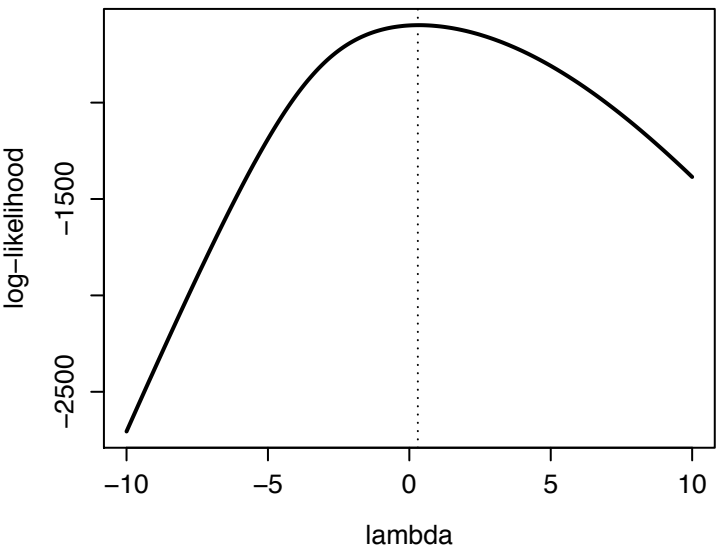

Untransformed

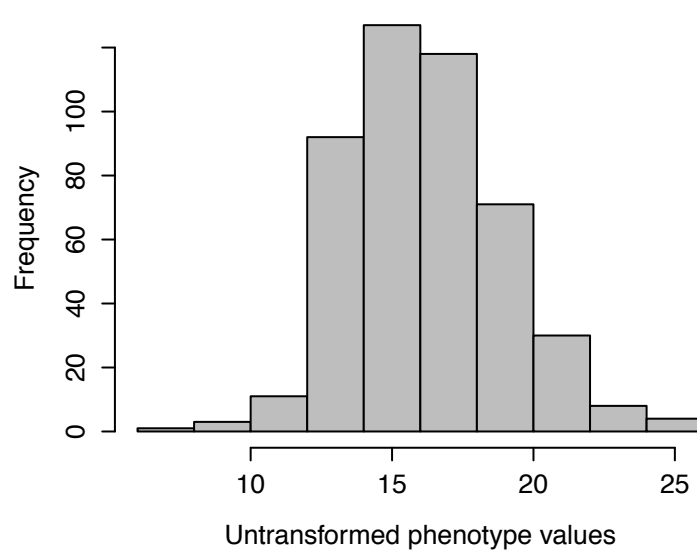

Transformed with lambda = 0.3

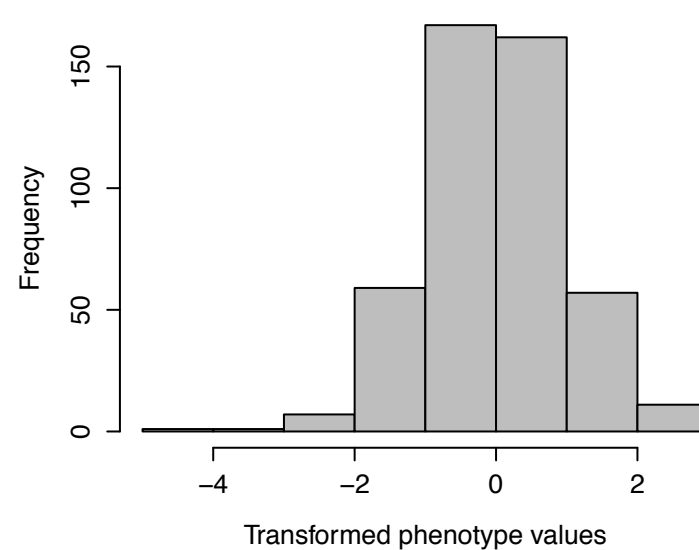

QQ plot untransformed

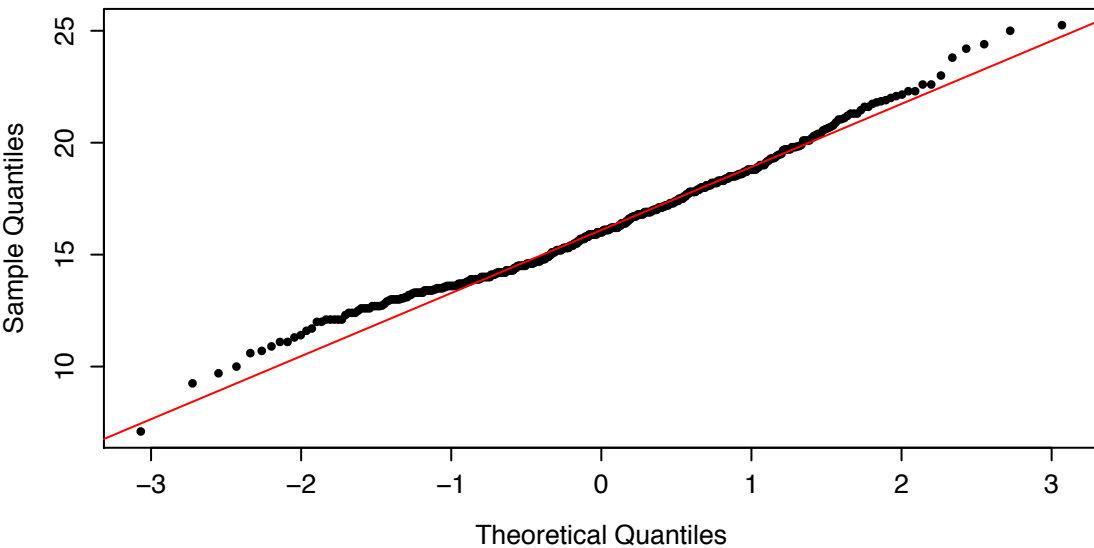

QQ plot transformed

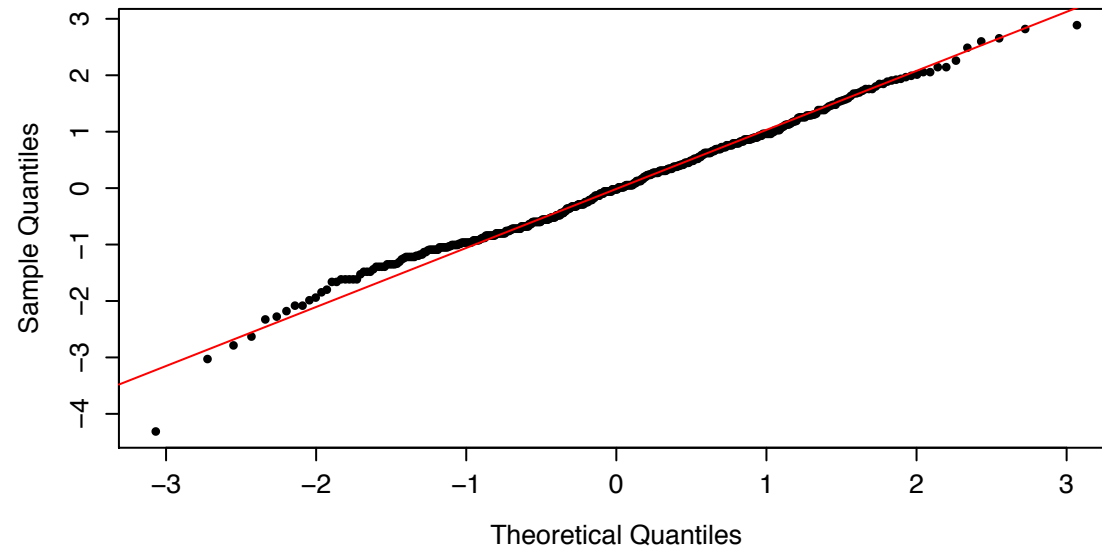

berry weight 2009 (N = 476)

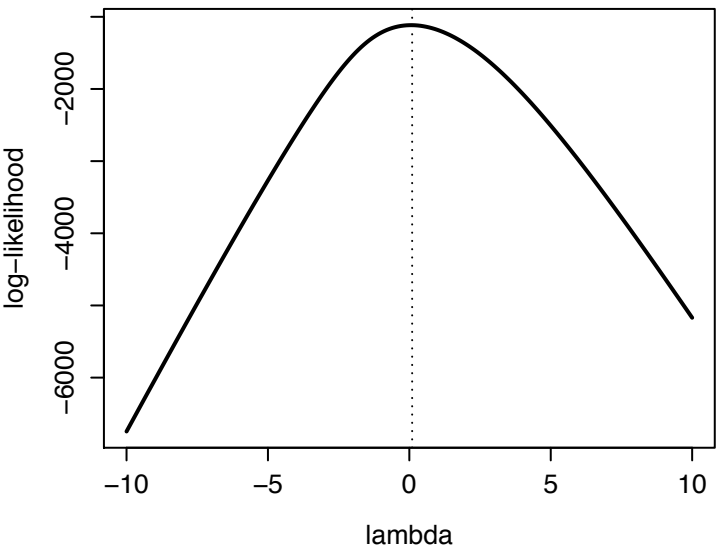

Untransformed

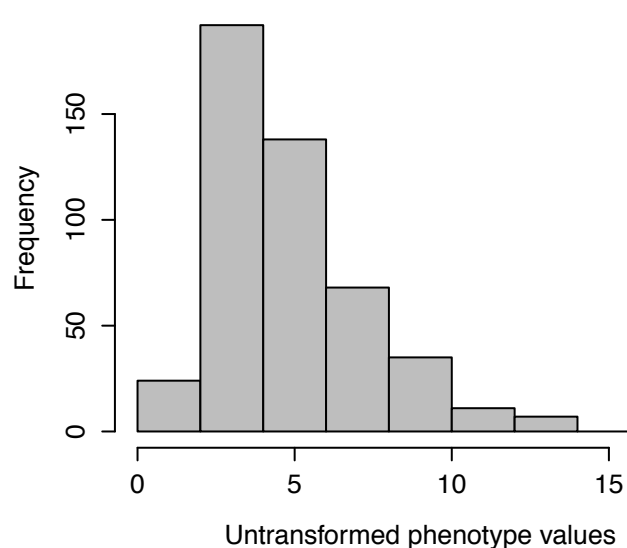

Transformed with lambda = 0.1

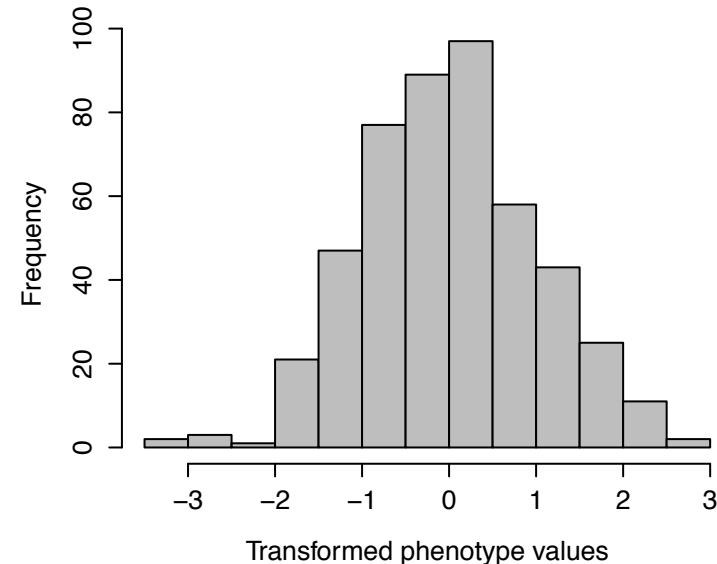

QQ plot untransformed

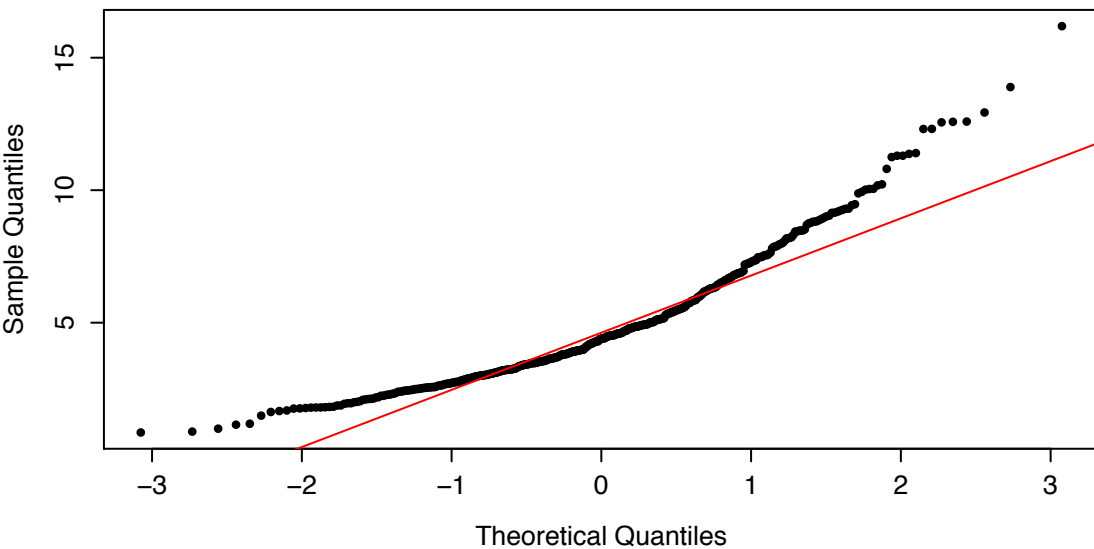

QQ plot transformed

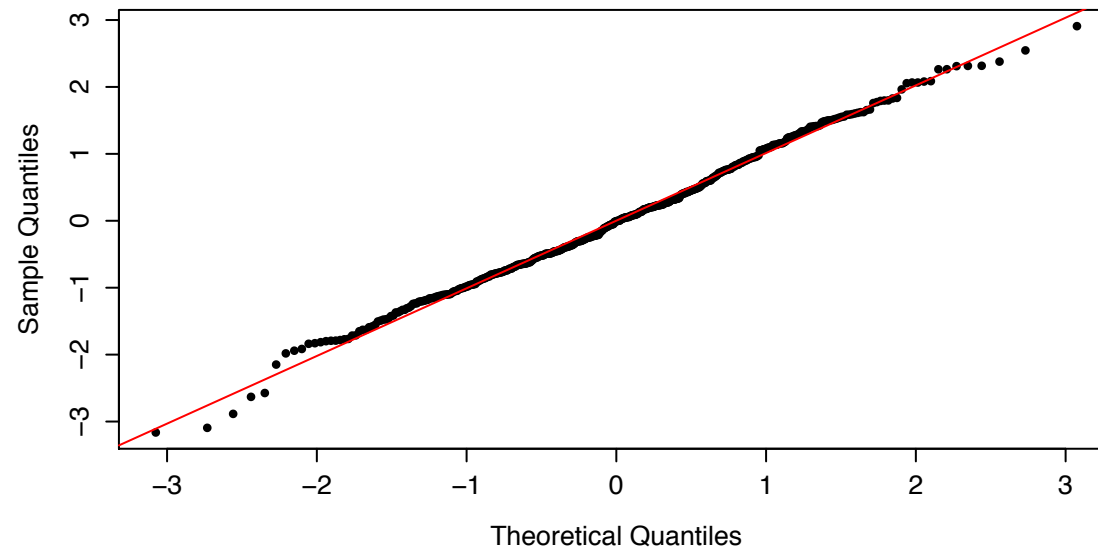

bloom date 1996 (N = 453)

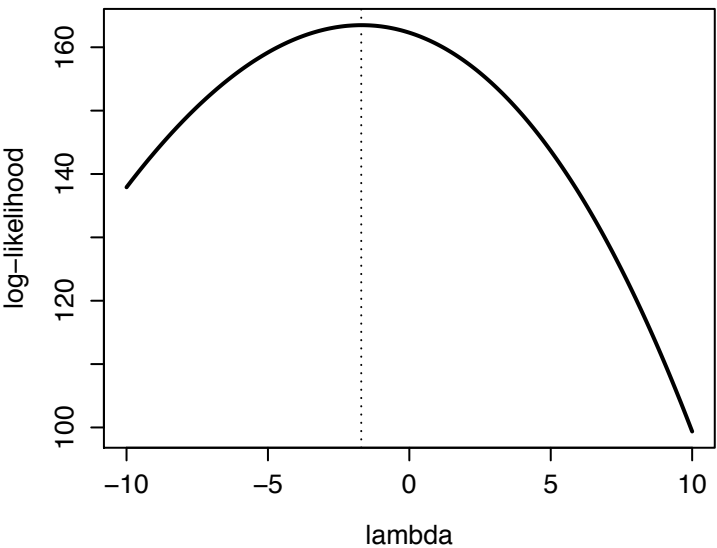

Untransformed

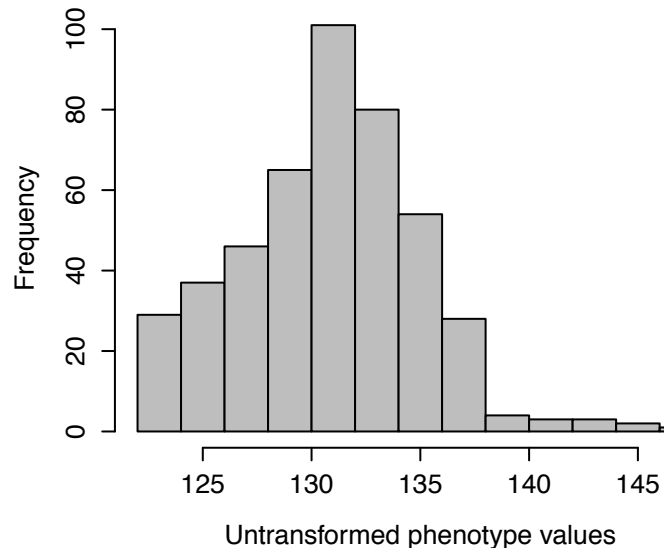

Transformed with lambda = -1.7

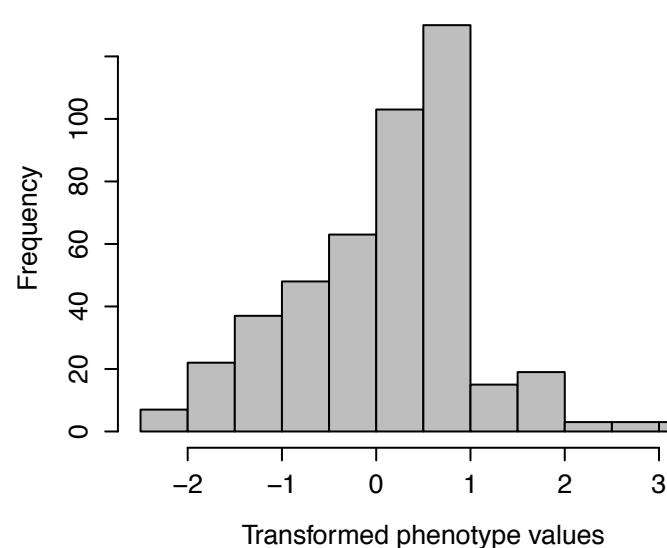

QQ plot untransformed

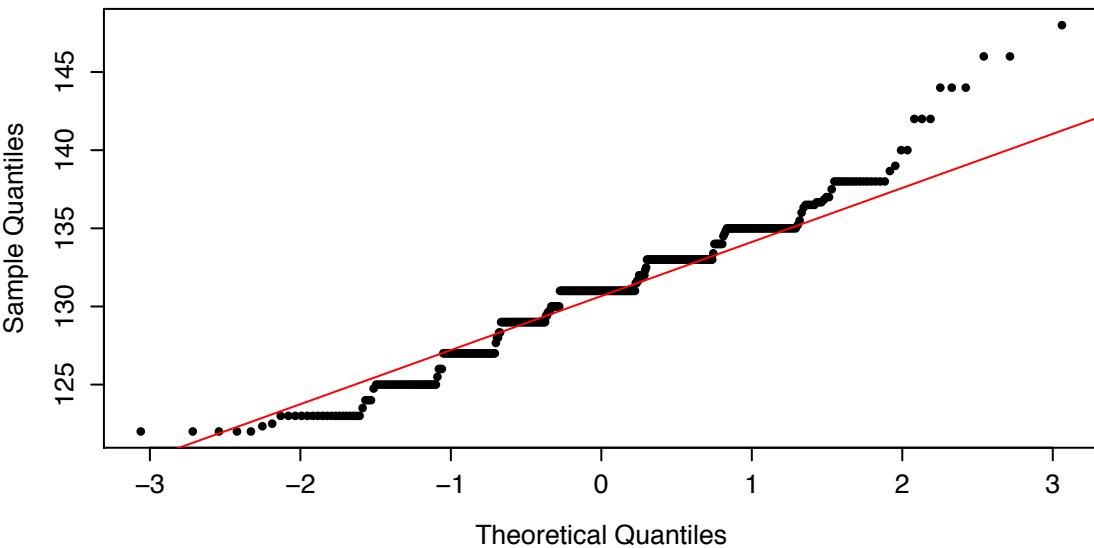

QQ plot transformed

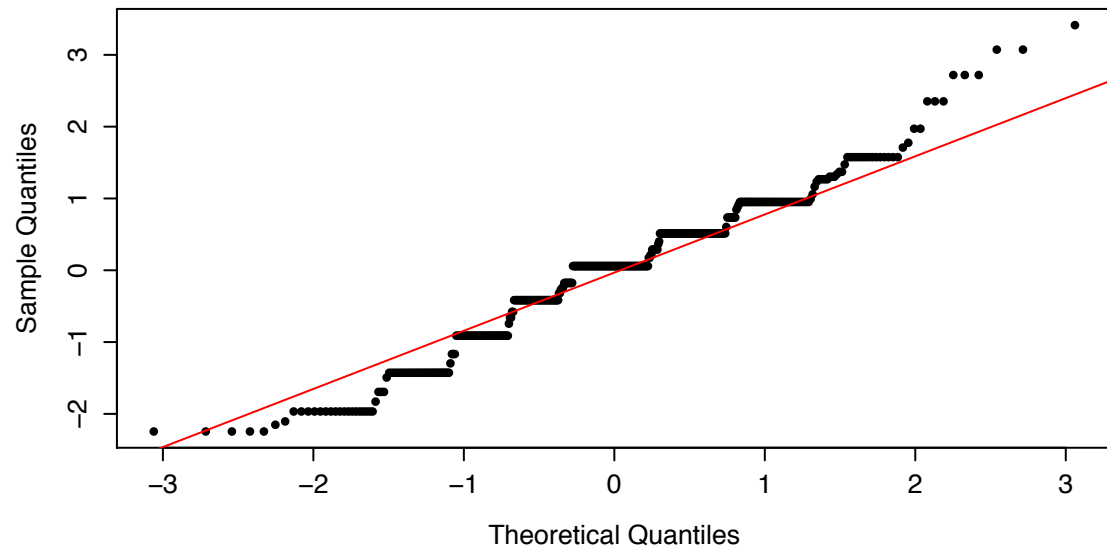

field brix 1993 (N = 184)

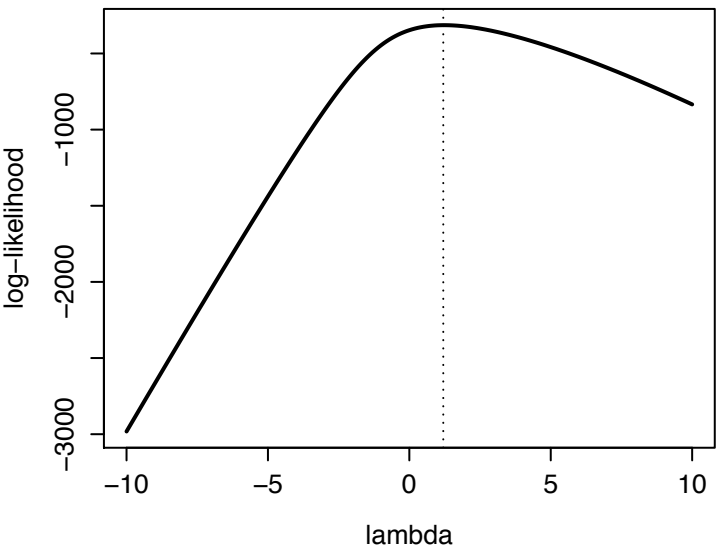

Untransformed

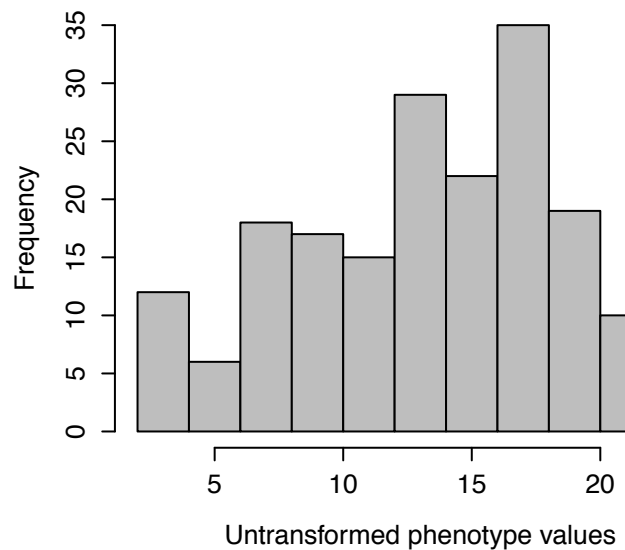

Transformed with lambda = 1.2

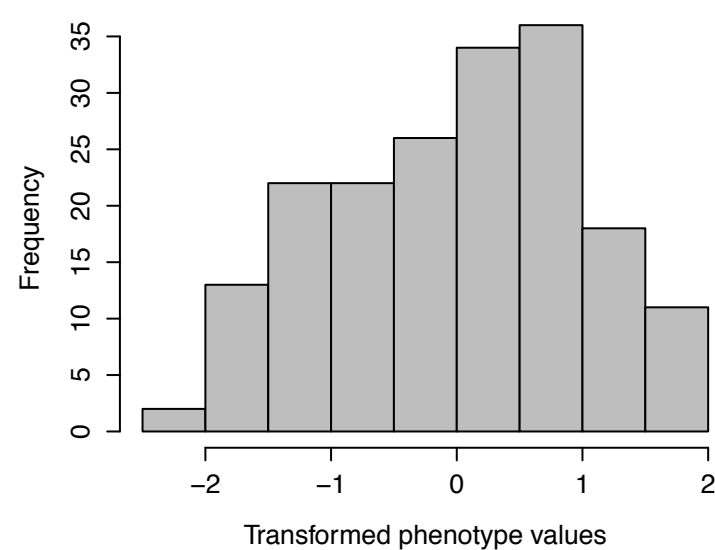

QQ plot untransformed

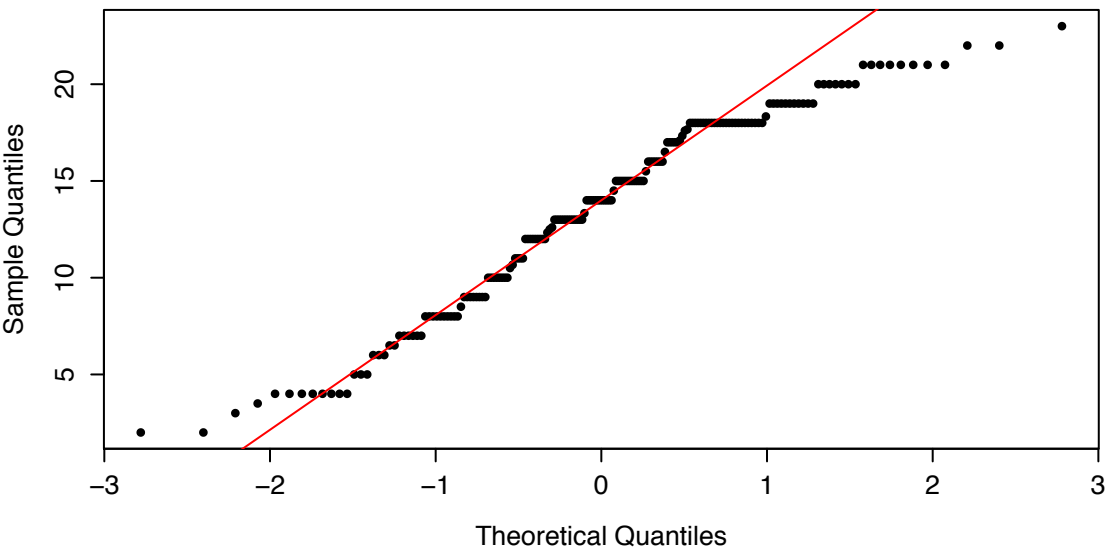

QQ plot transformed

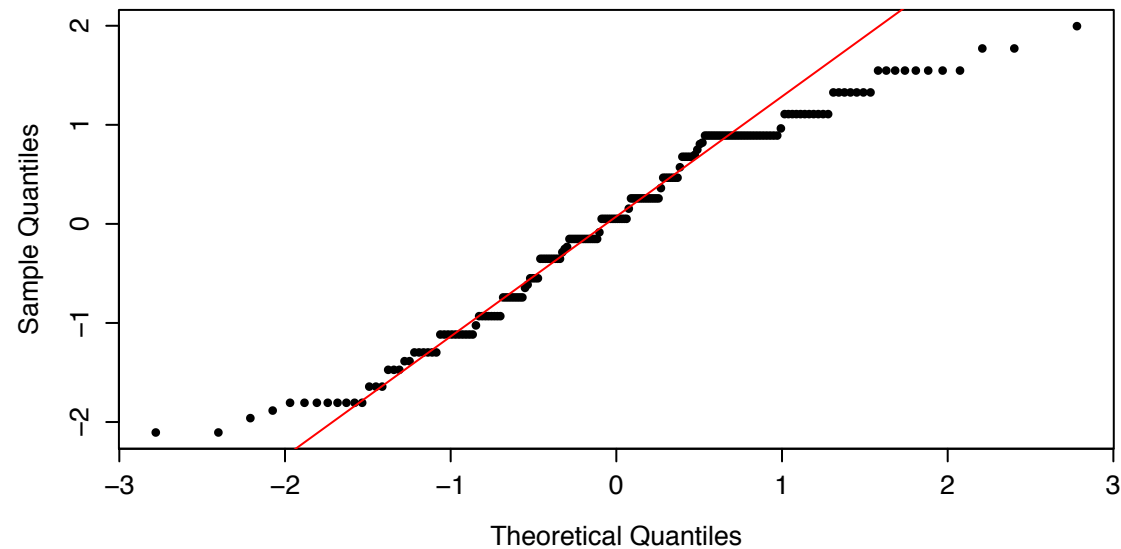

**bud burst date 1996 (N = 462)**

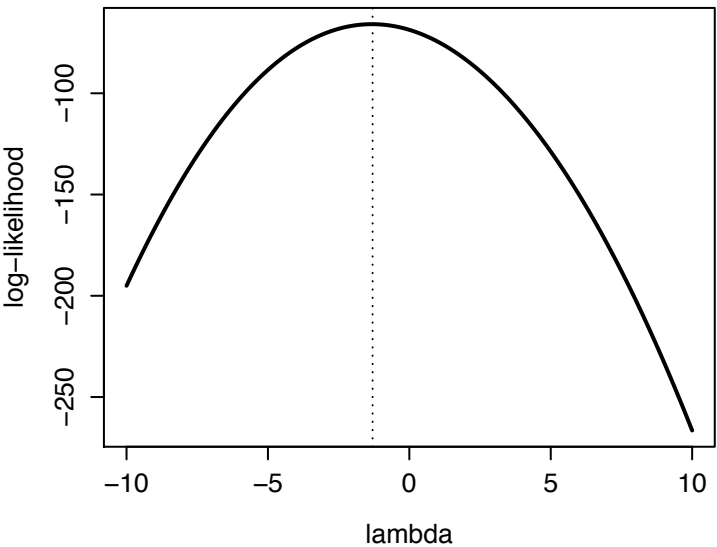

**Untransformed**

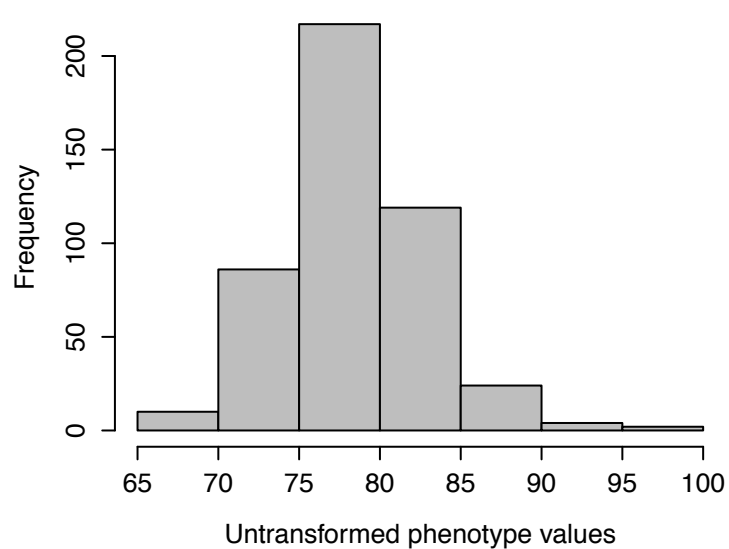

**Transformed with lambda = -1.3**

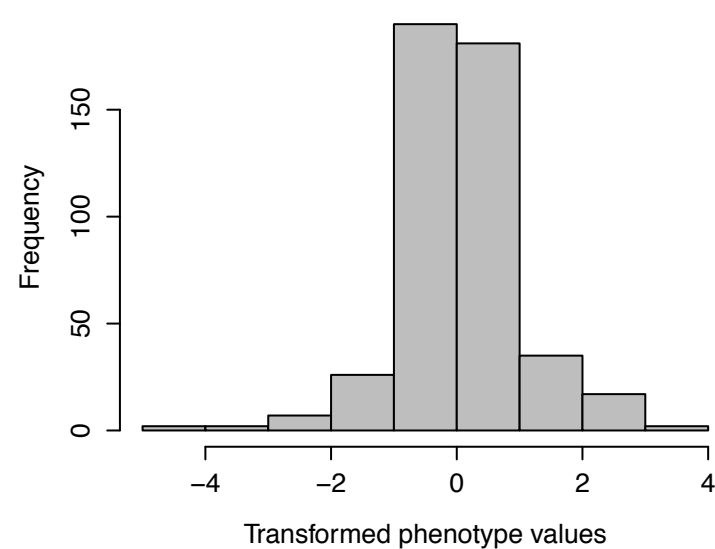

**QQ plot untransformed**

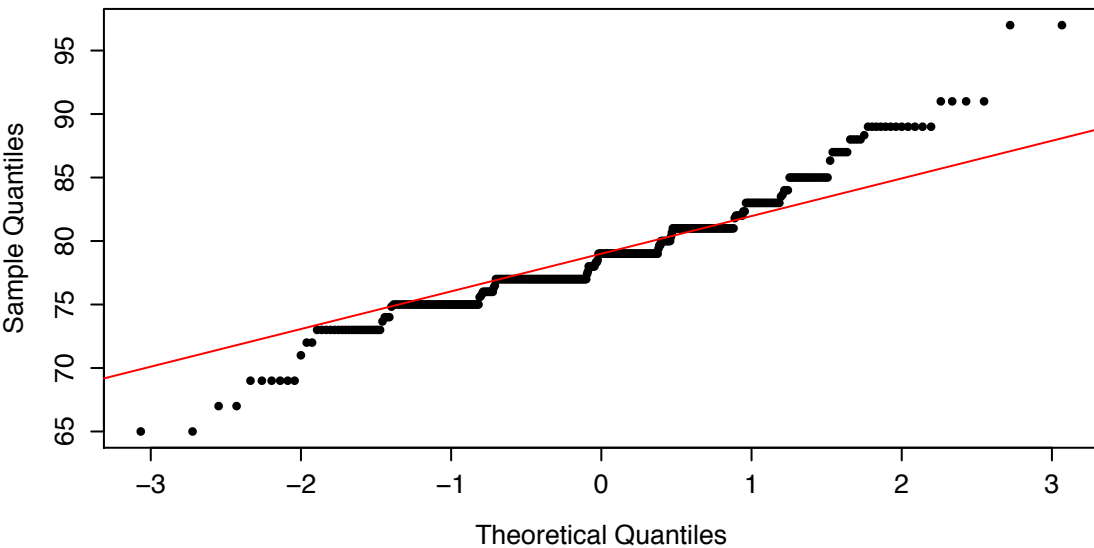

**QQ plot transformed**

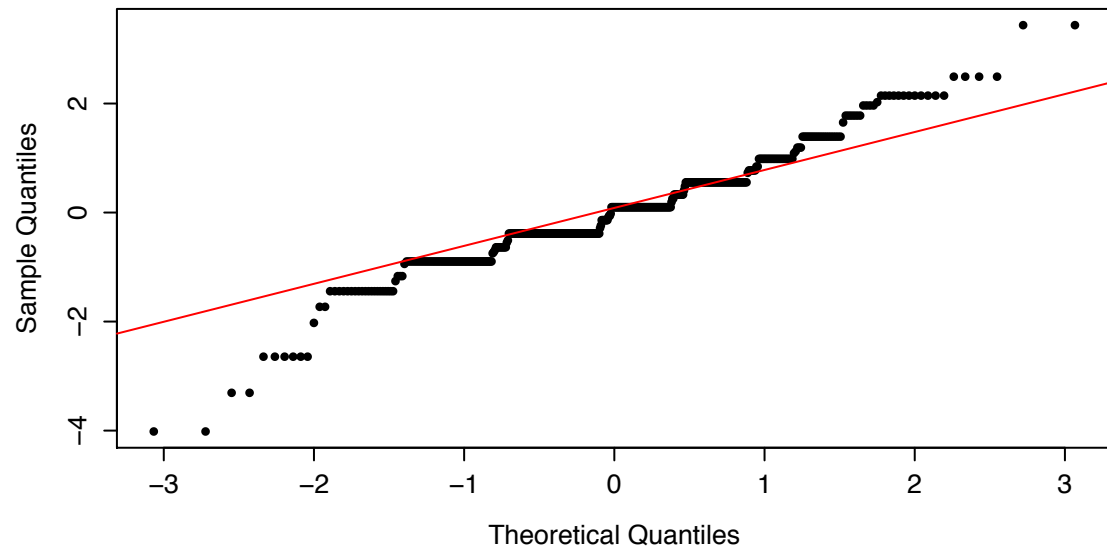



**bud burst date 2009 (N = 564)**

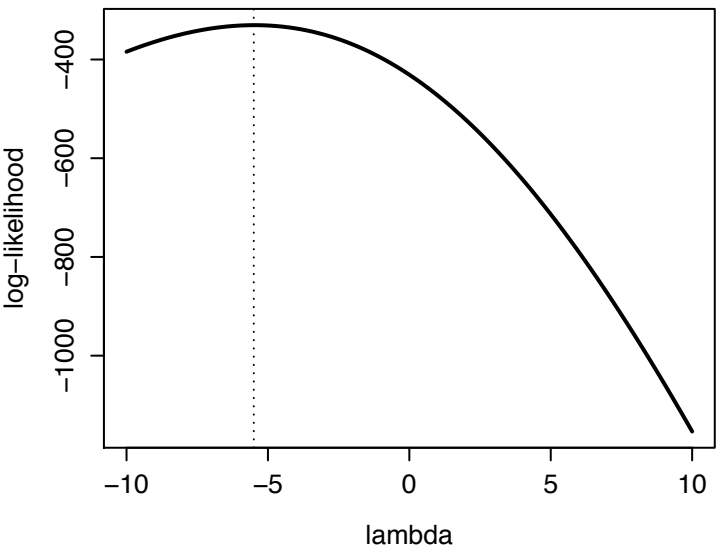

**Untransformed**

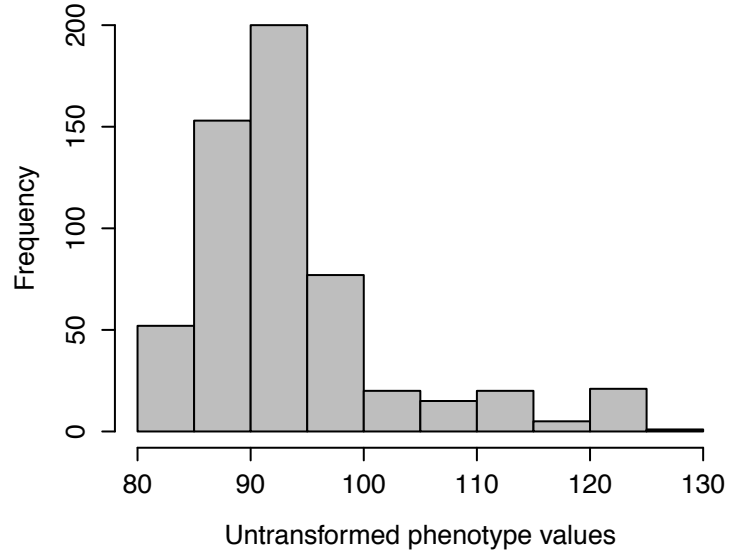

**Transformed with lambda = -5.5**

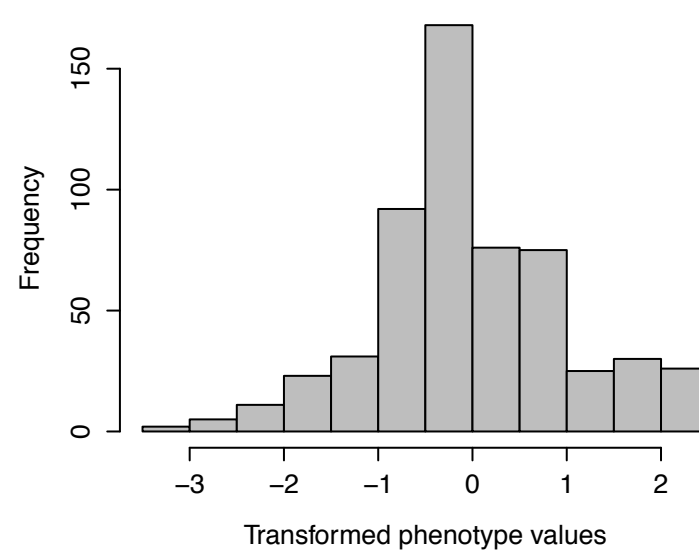

**QQ plot untransformed**

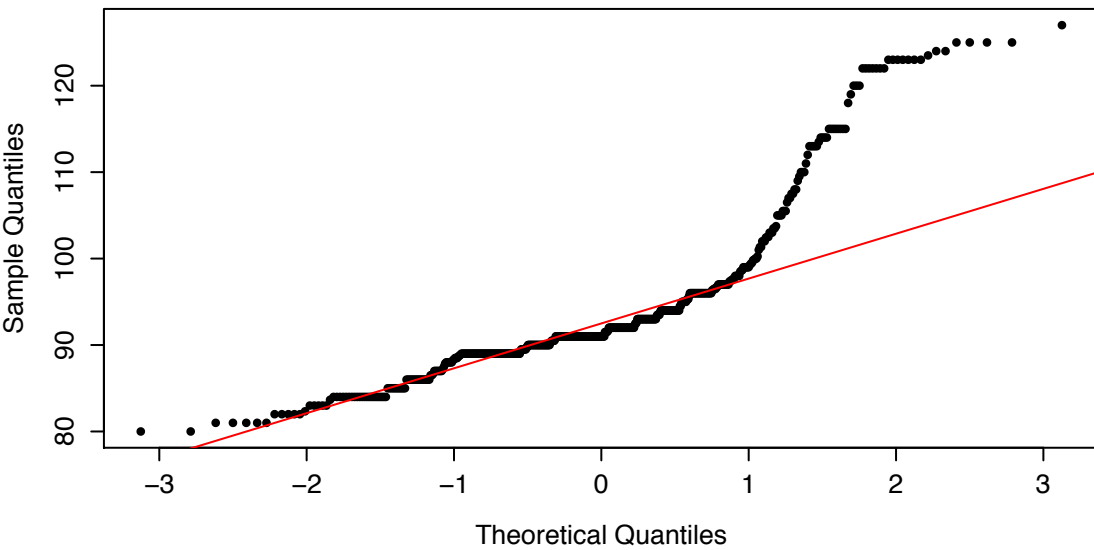

**QQ plot transformed**

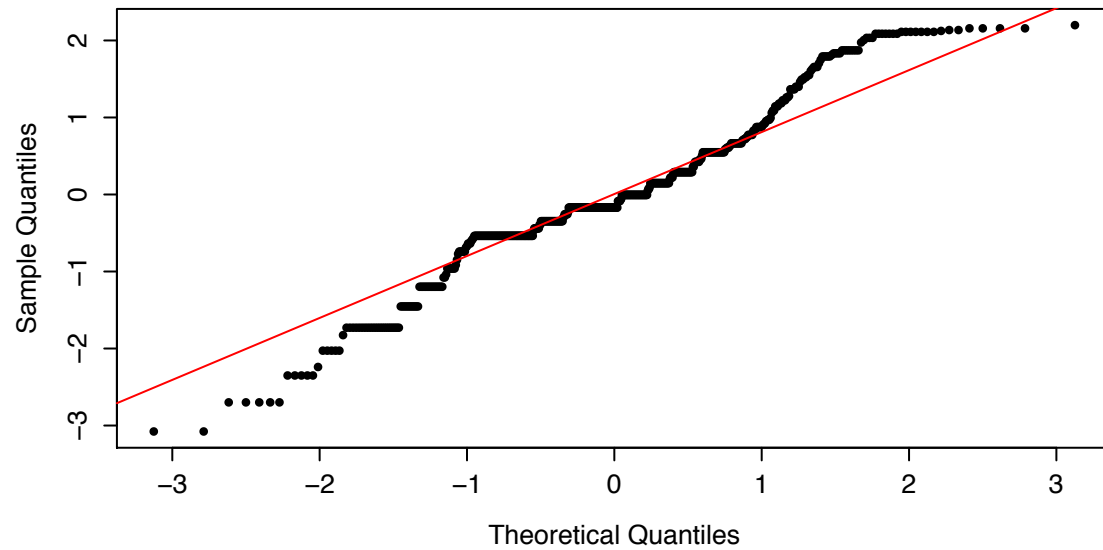

cluster length 2009 (N = 521)

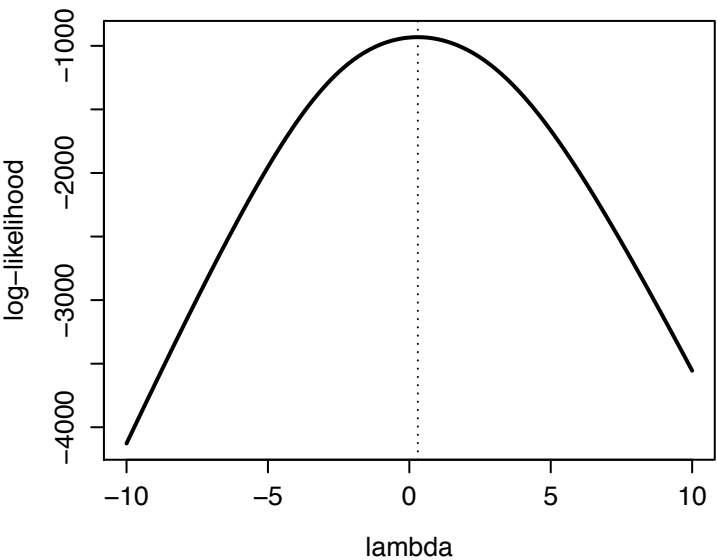

Untransformed

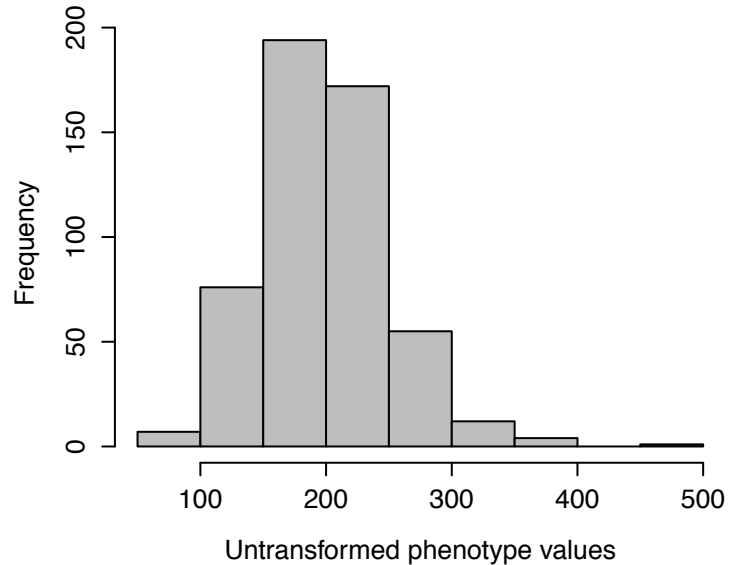

Transformed with lambda = 0.3

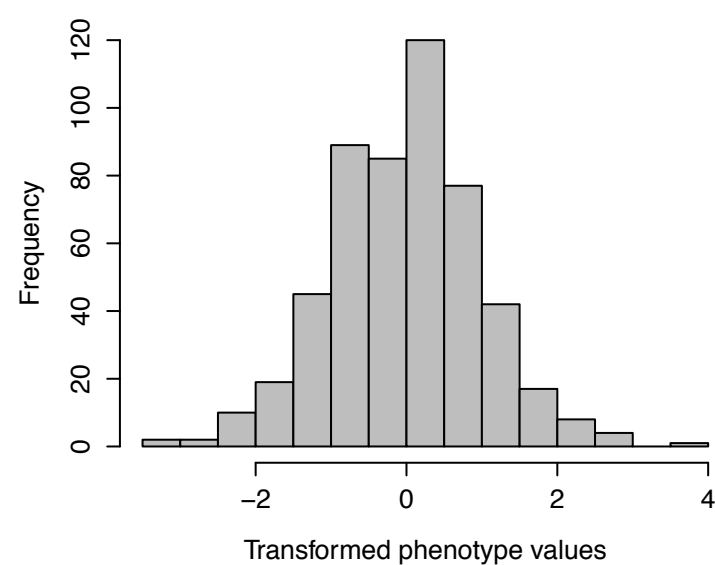

QQ plot untransformed

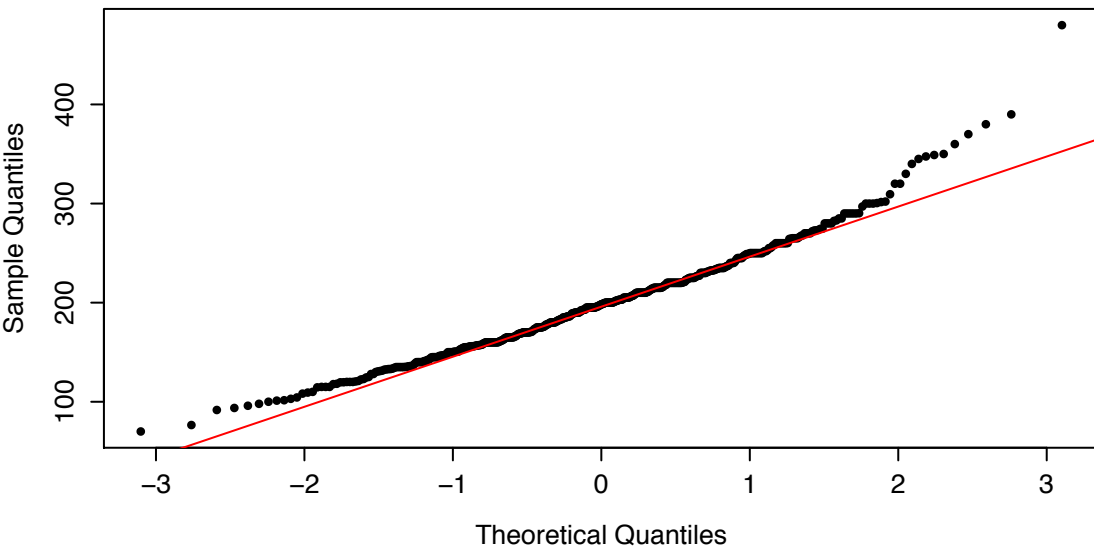

QQ plot transformed

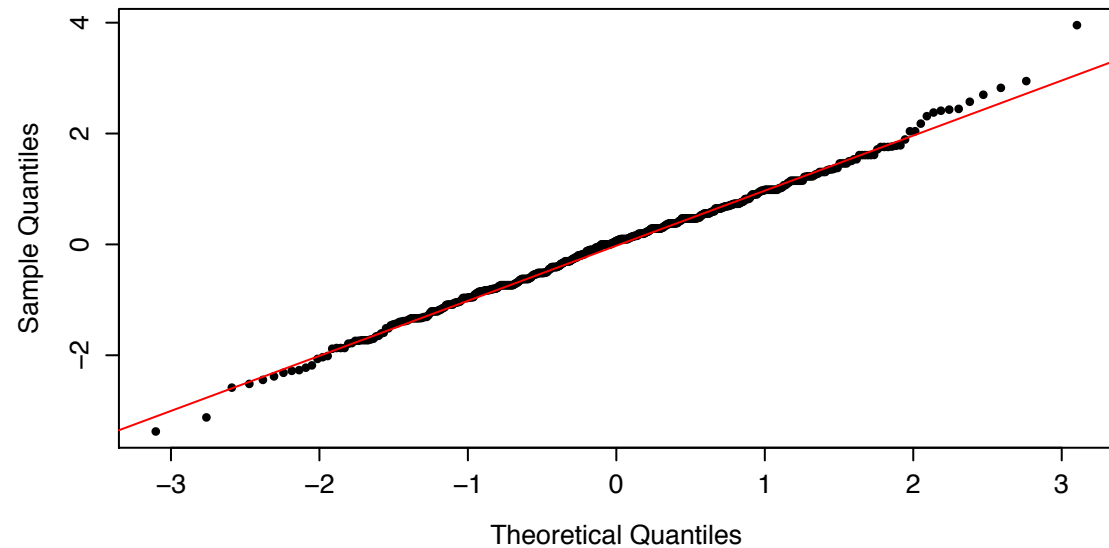

cluster width 2009 (N = 523)

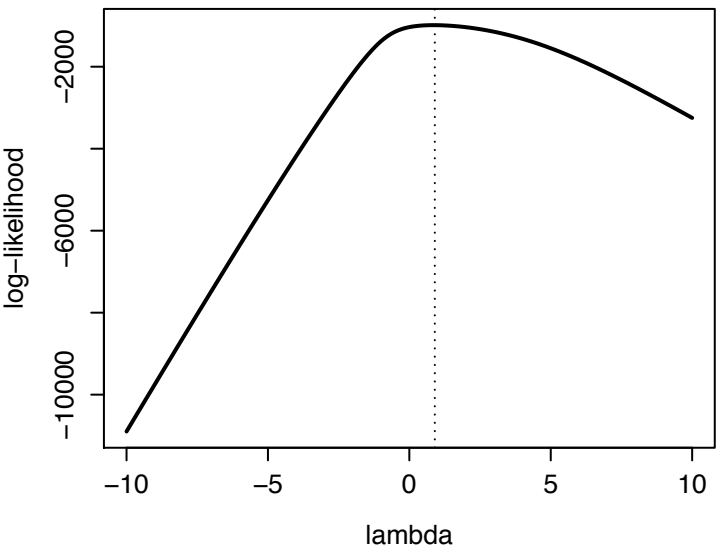

Untransformed

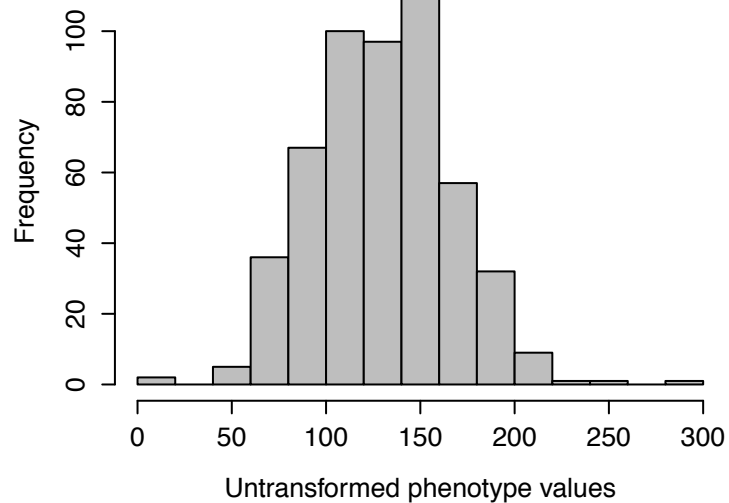

Transformed with lambda = 0.9

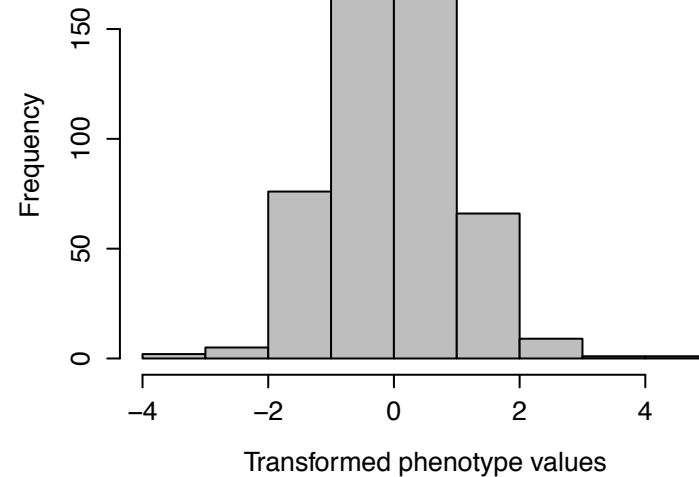

QQ plot untransformed

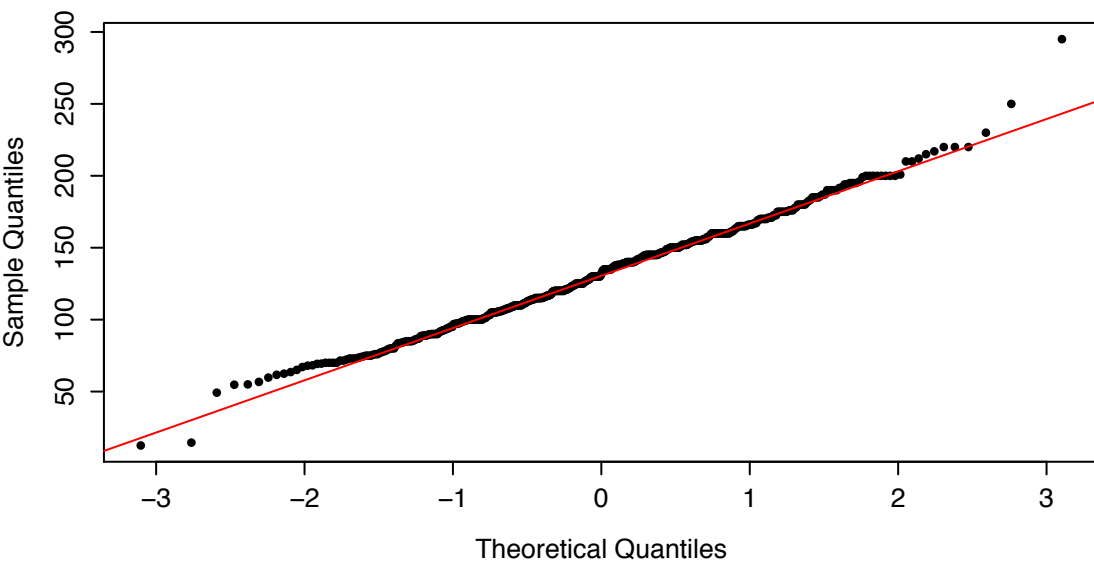

QQ plot transformed

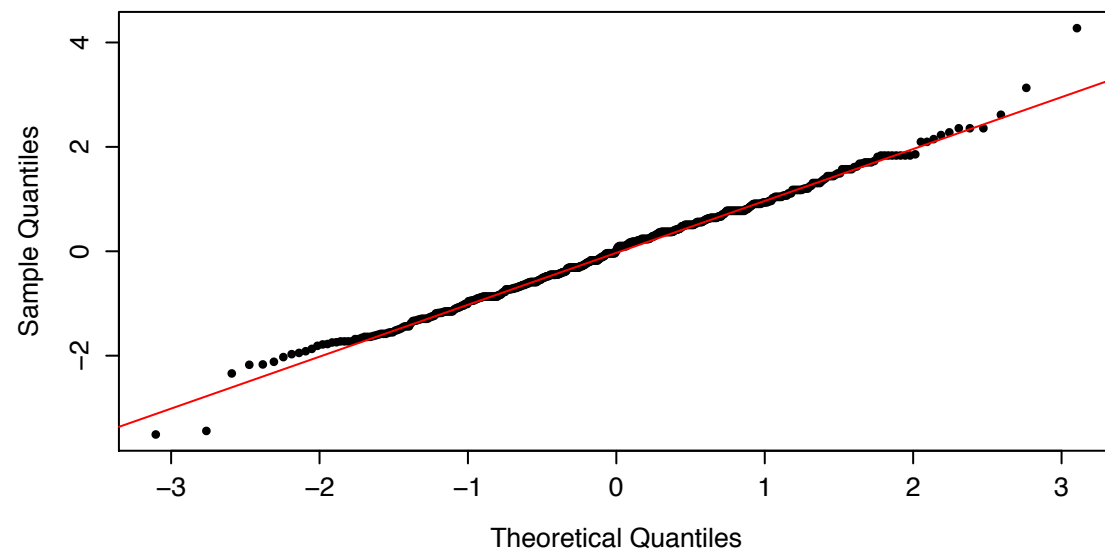

cluster weight 2009 (N = 459)

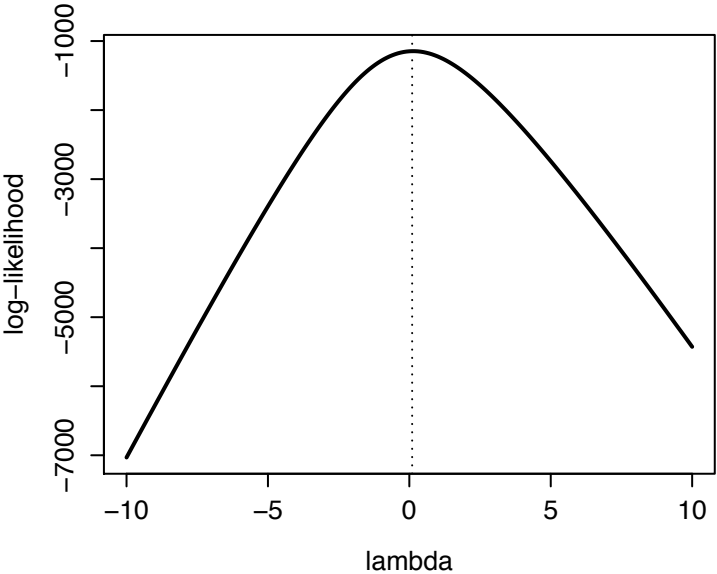

Untransformed

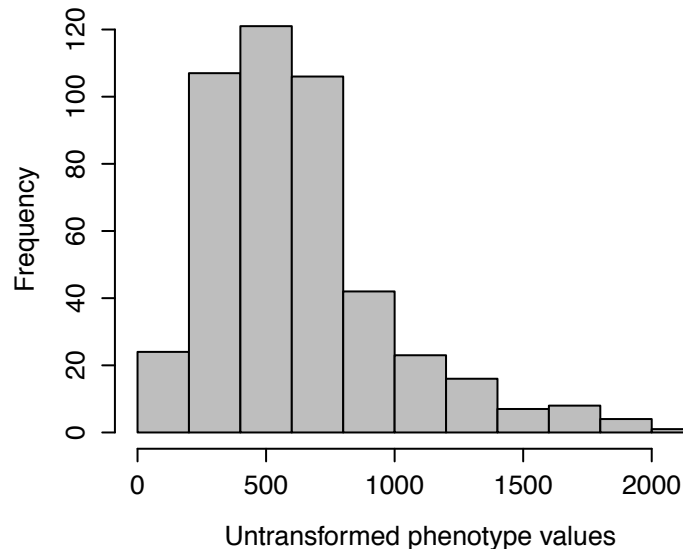

Transformed with lambda = 0.1

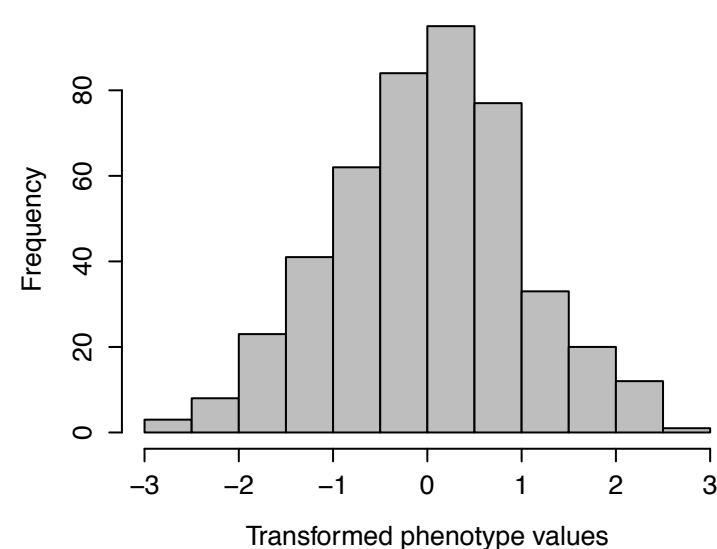

QQ plot untransformed

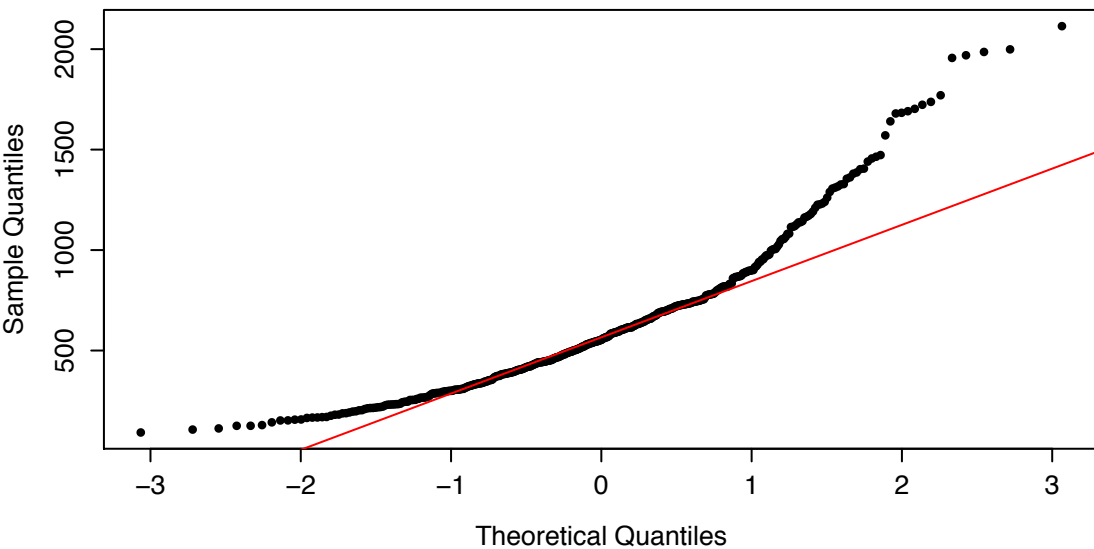

QQ plot transformed

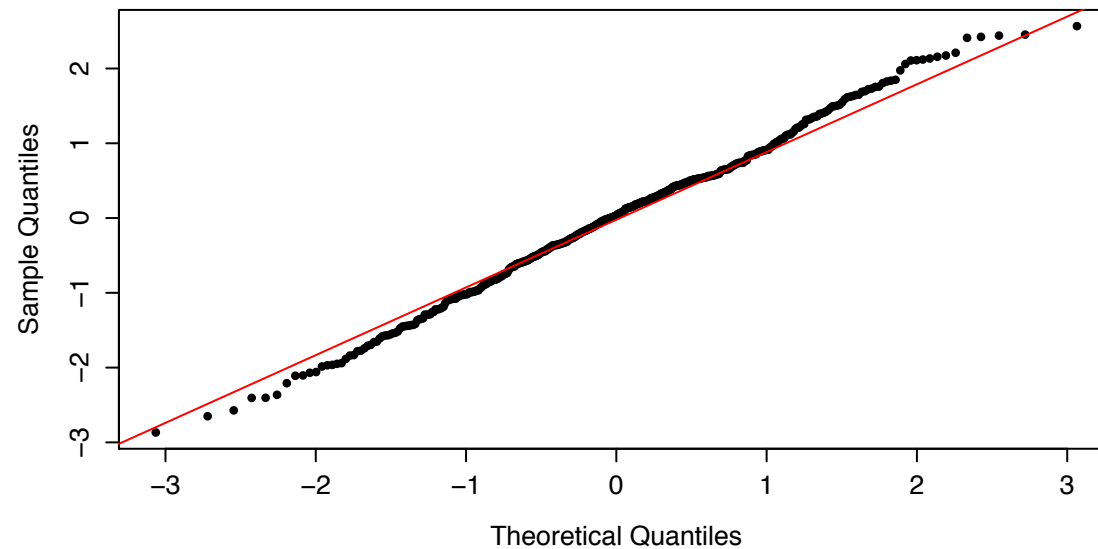

lab brix 2009 (N = 521)

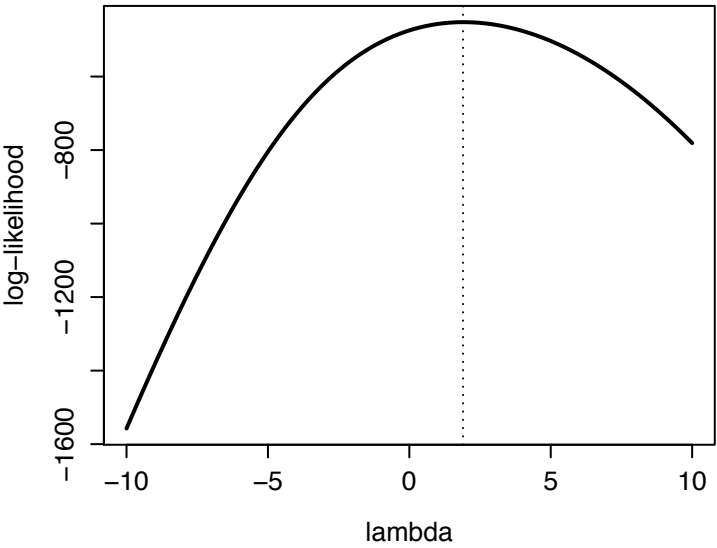

Untransformed

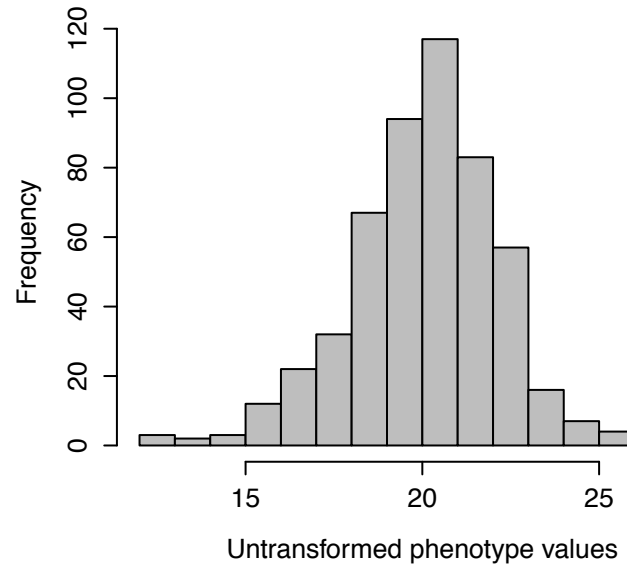

Transformed with lambda = 1.9

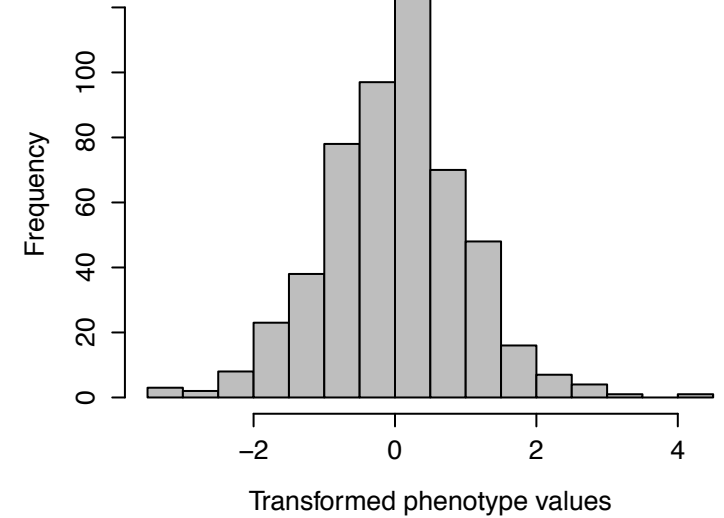

QQ plot untransformed

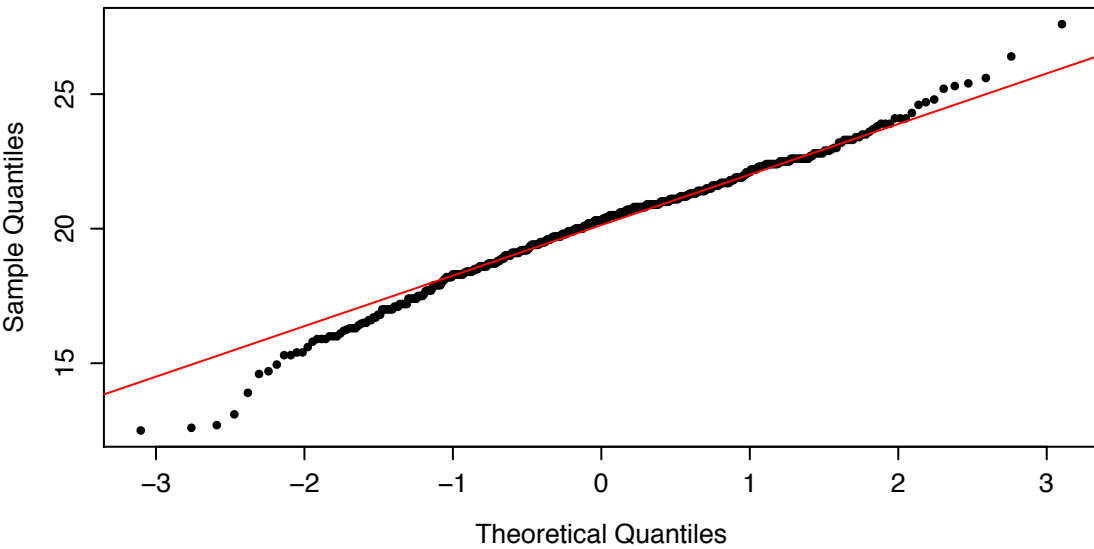

QQ plot transformed

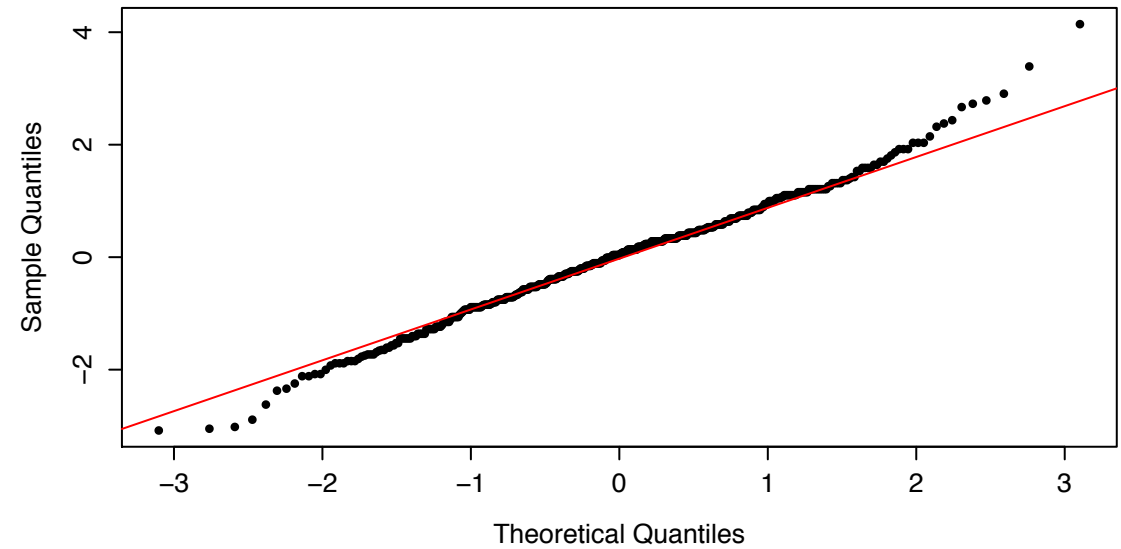

leaf date 1996 (N = 459)

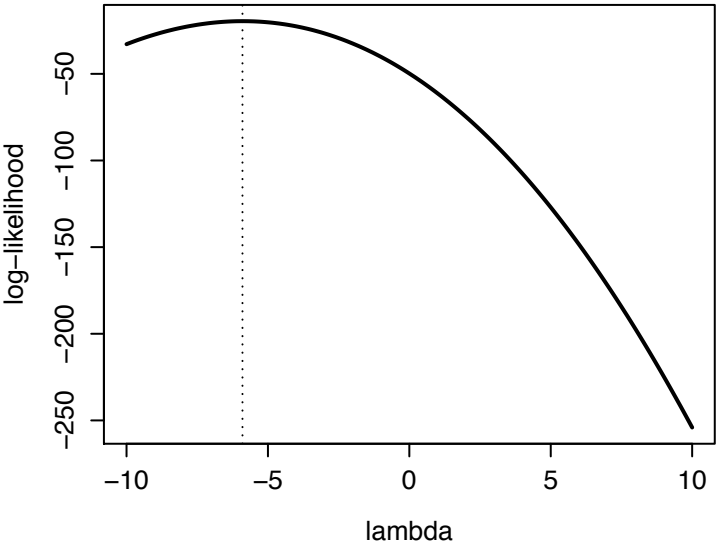

Untransformed

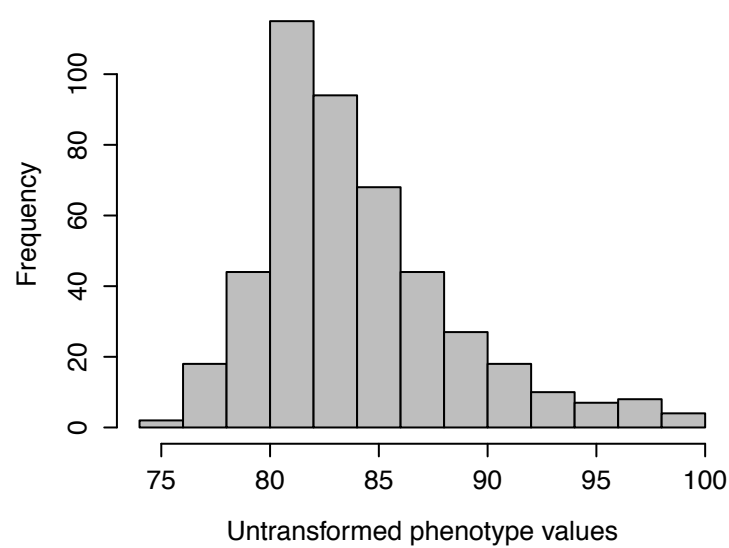

Transformed with lambda = -5.9

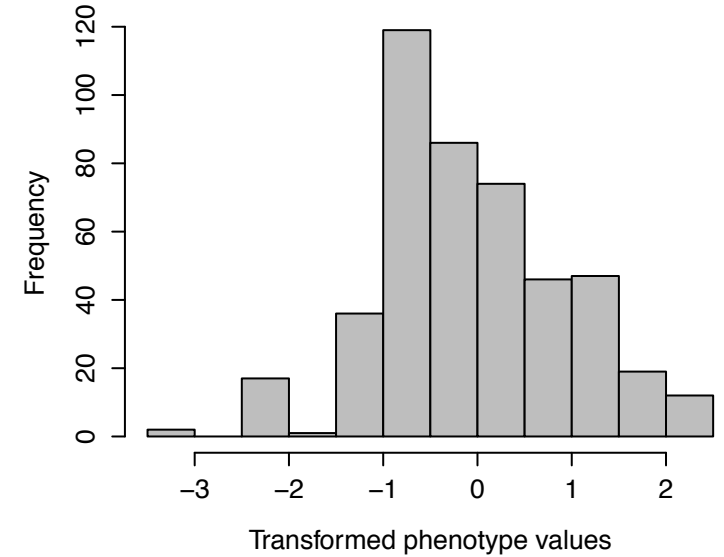

QQ plot untransformed

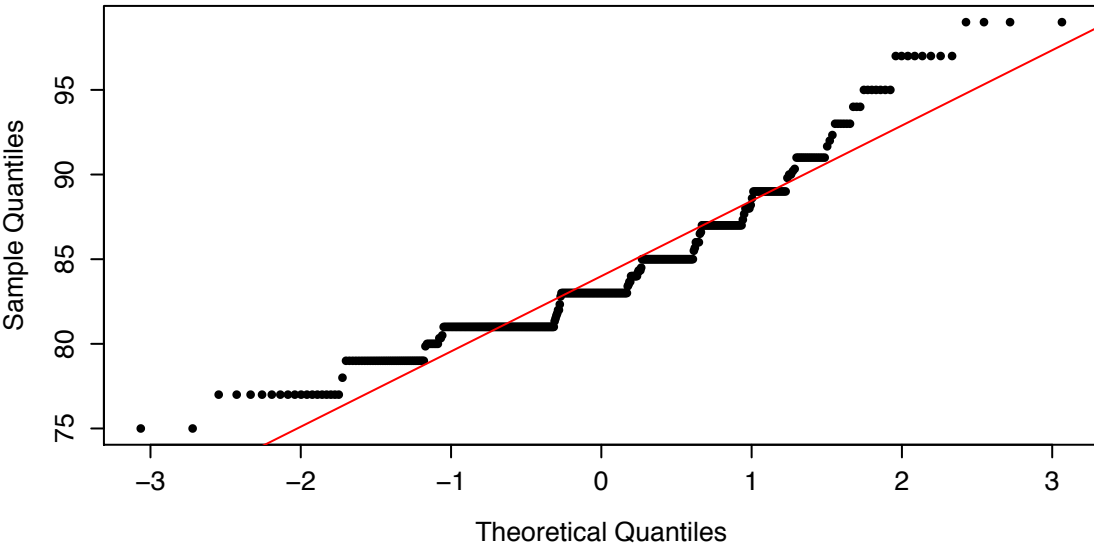

QQ plot transformed

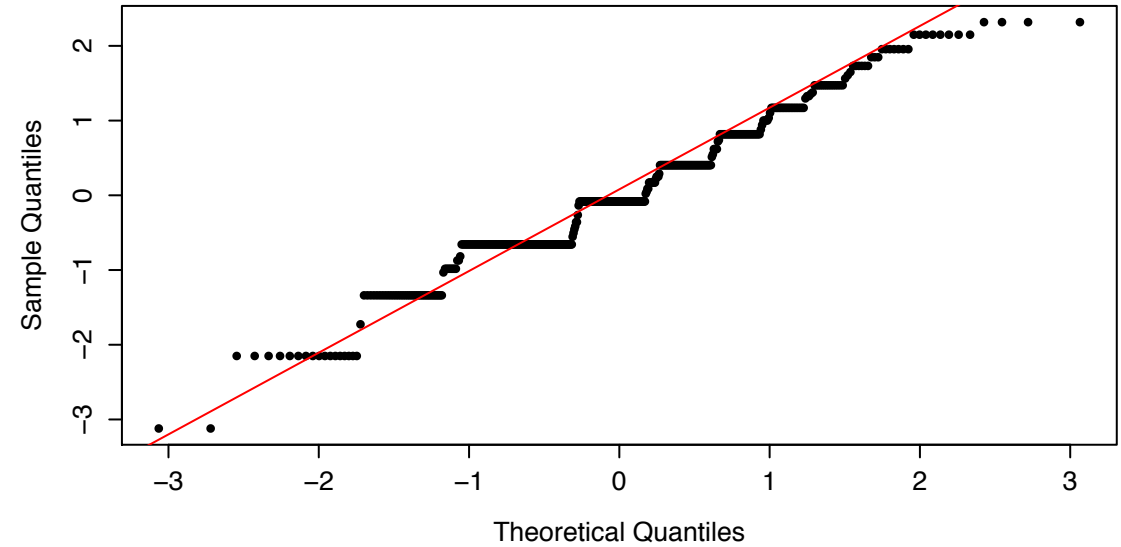

peduncle length 2009 (N = 514)

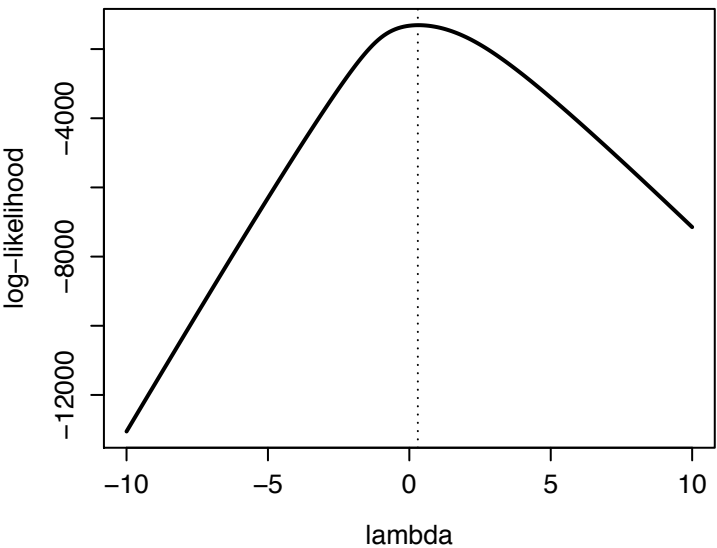

Untransformed

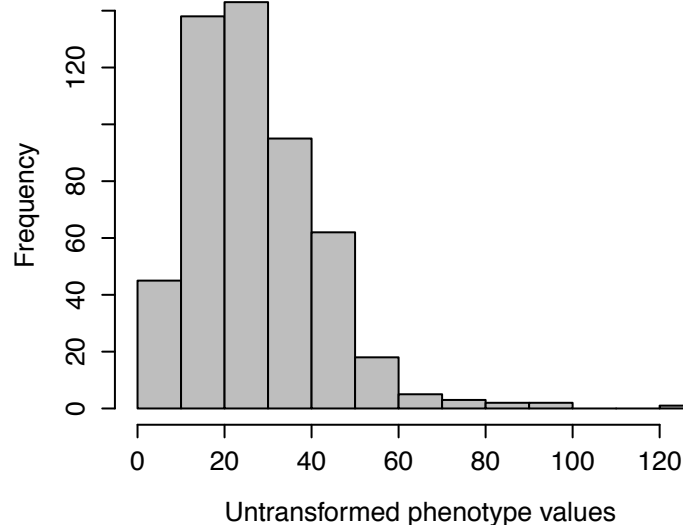

Transformed with lambda = 0.3

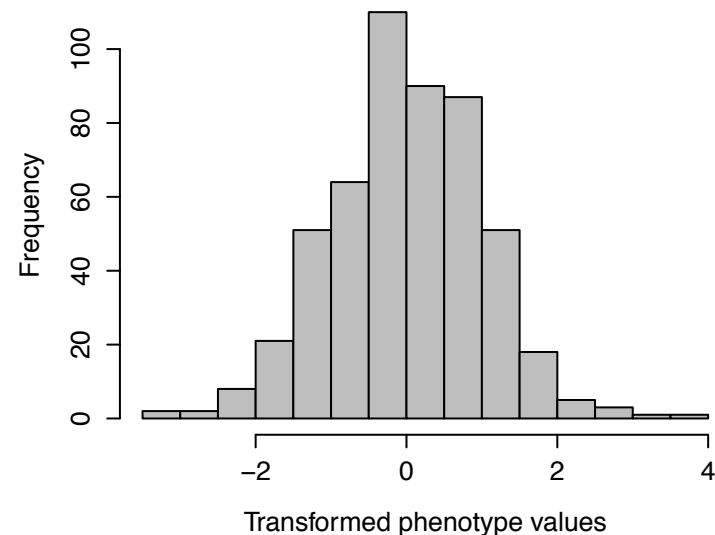

QQ plot untransformed

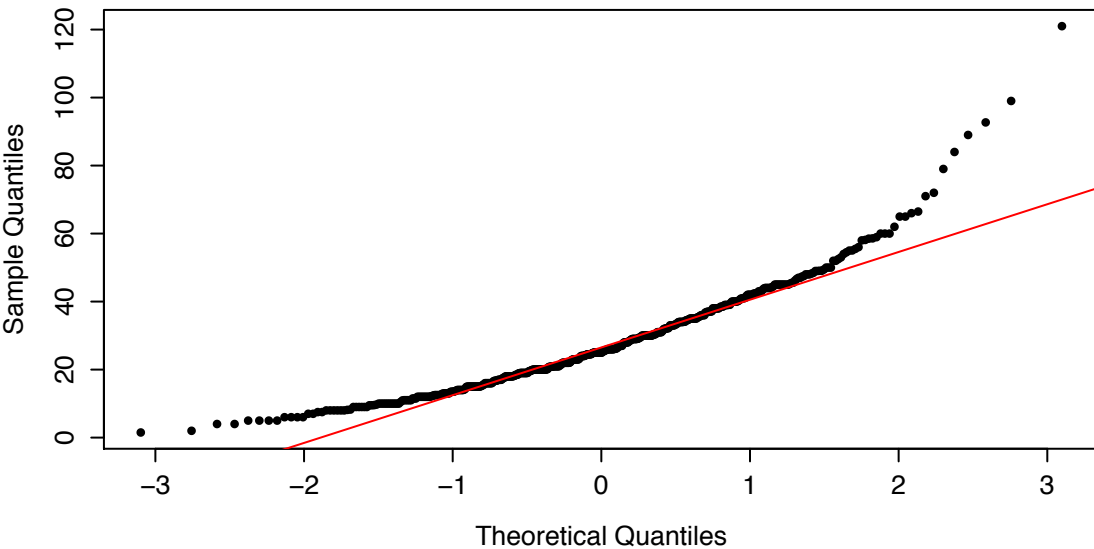

QQ plot transformed

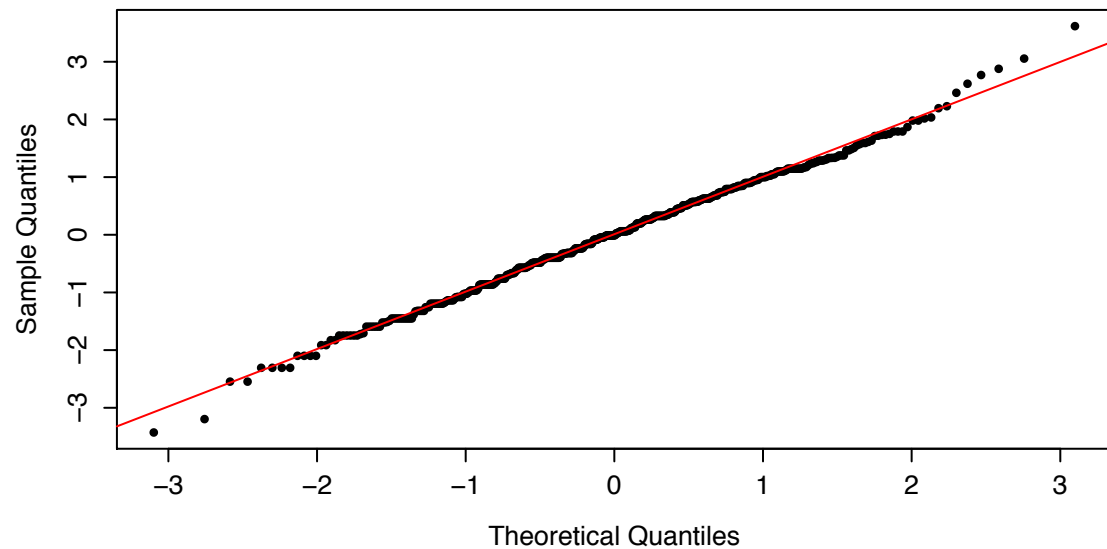

seed number 2009 (N = 505)

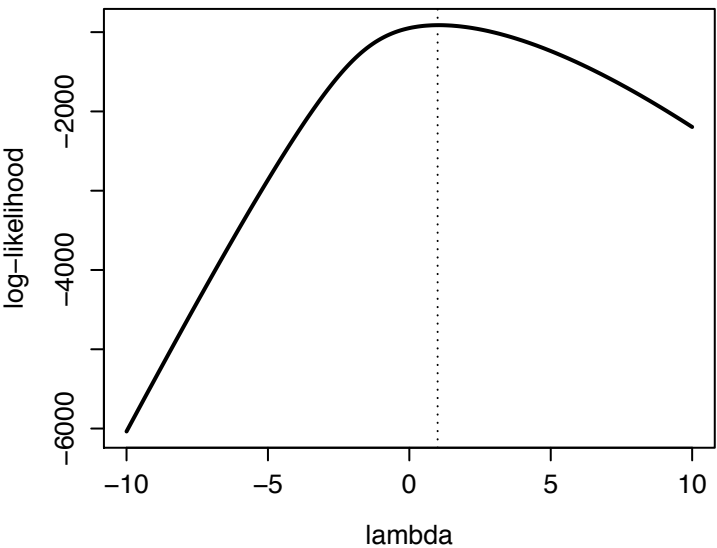

Untransformed

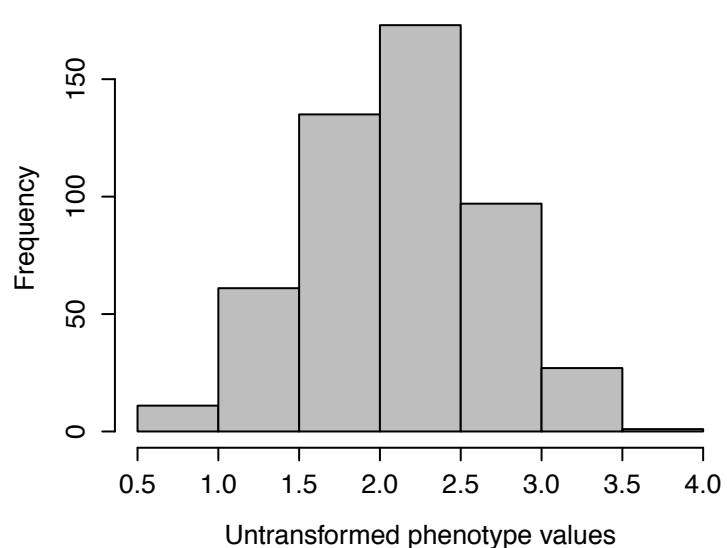

Transformed with lambda = 1

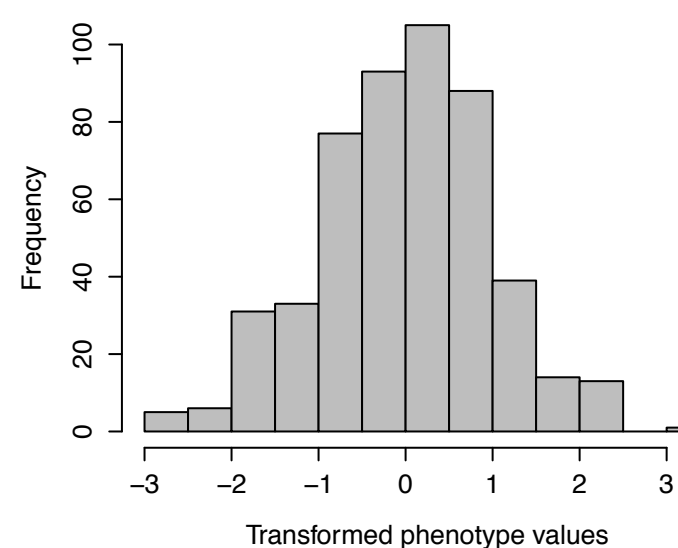

QQ plot untransformed

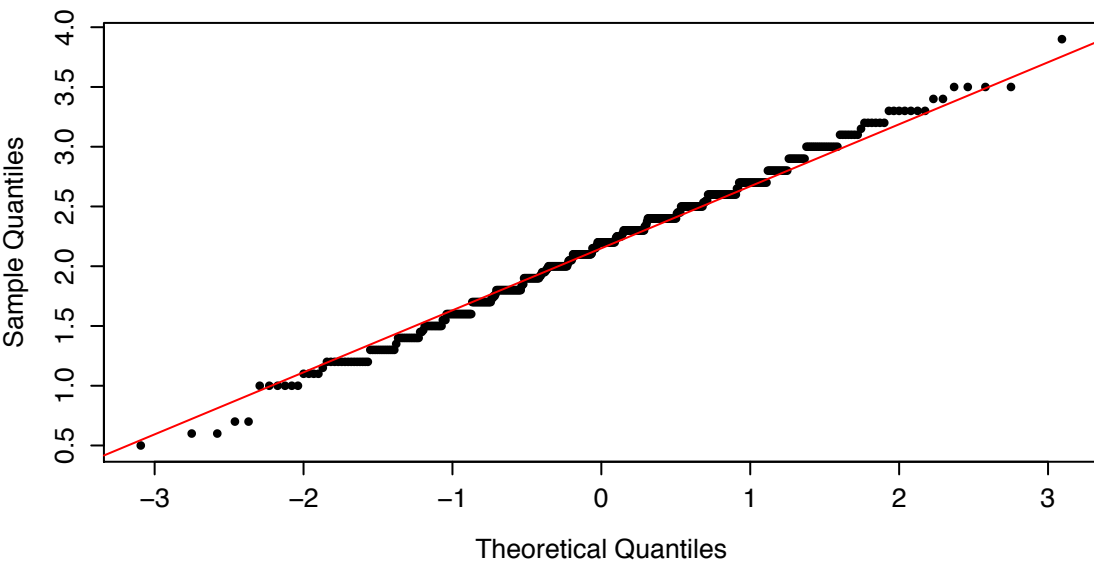

QQ plot transformed

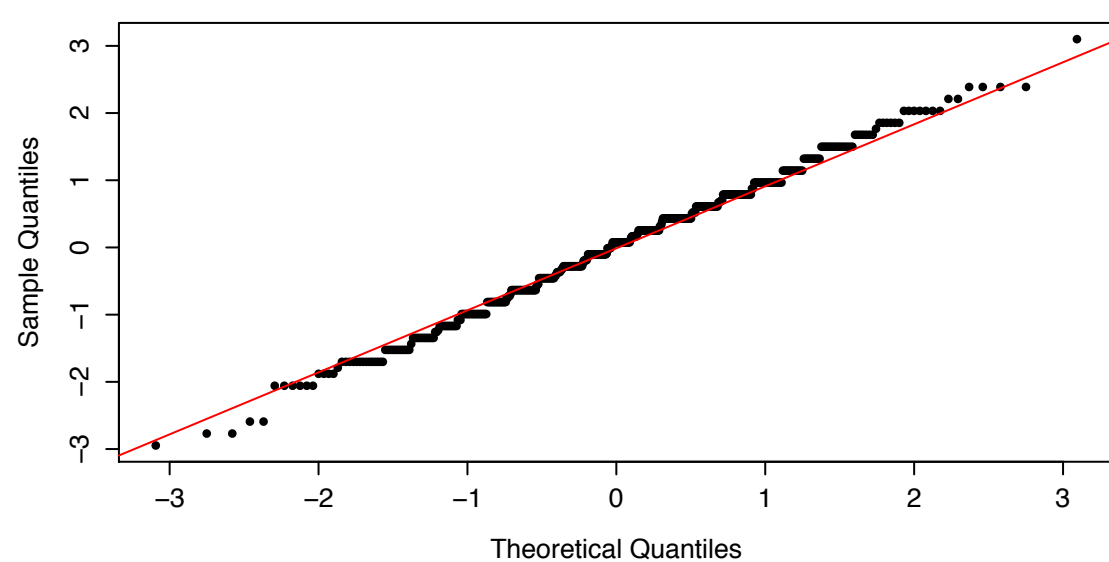



seed weight 2009 (N = 504)

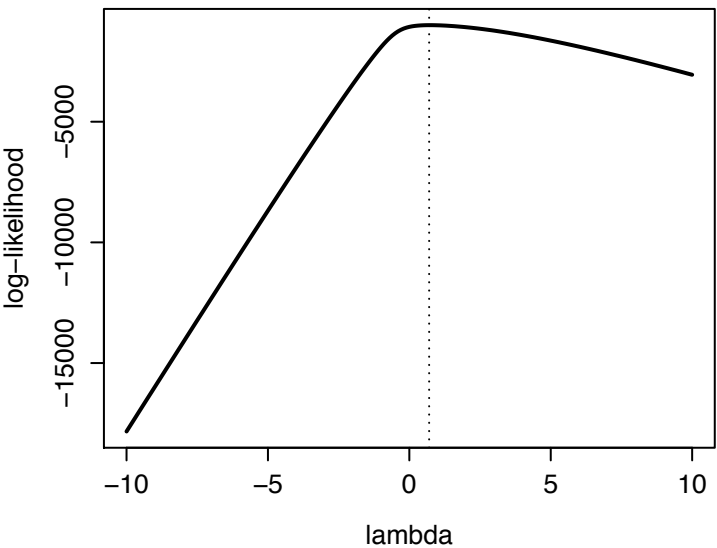

Untransformed

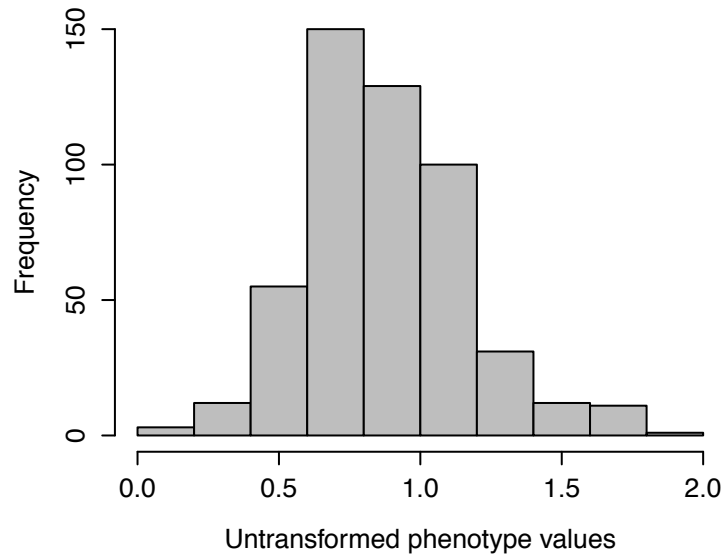

Transformed with lambda = 0.7

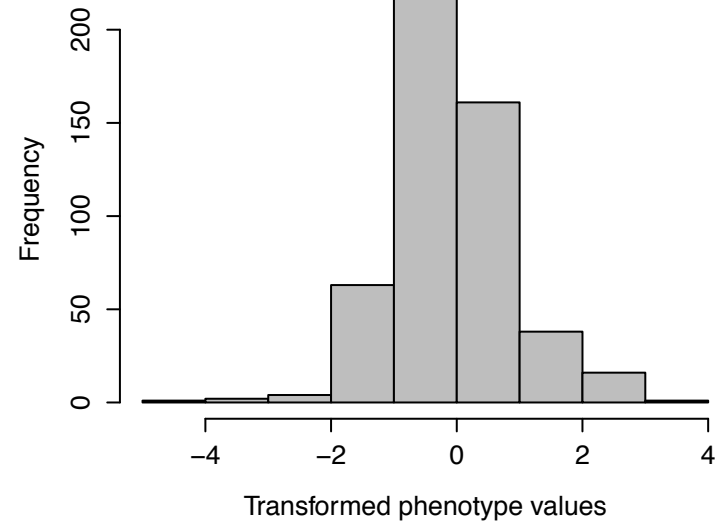

QQ plot untransformed

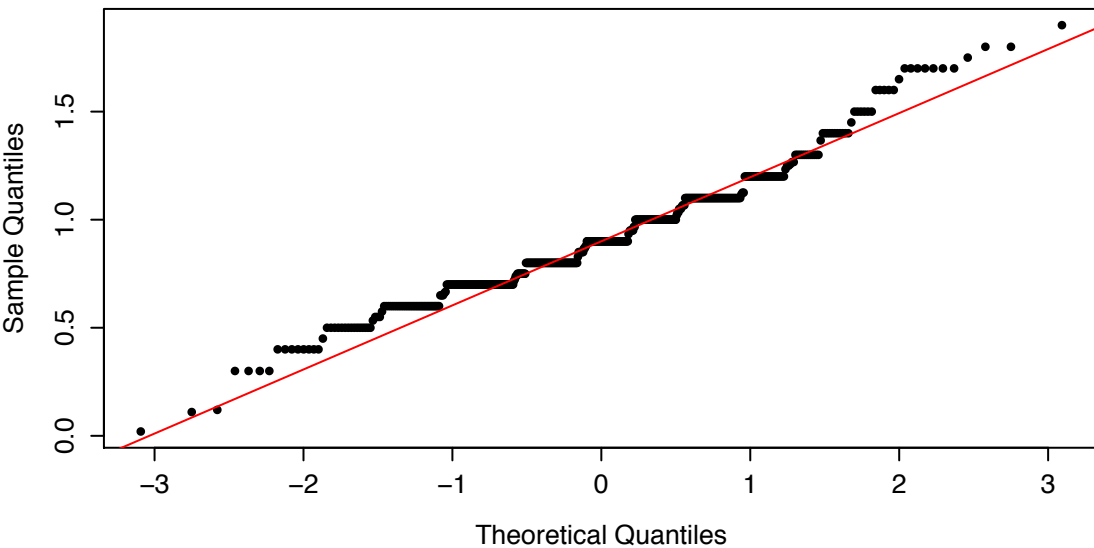

QQ plot transformed

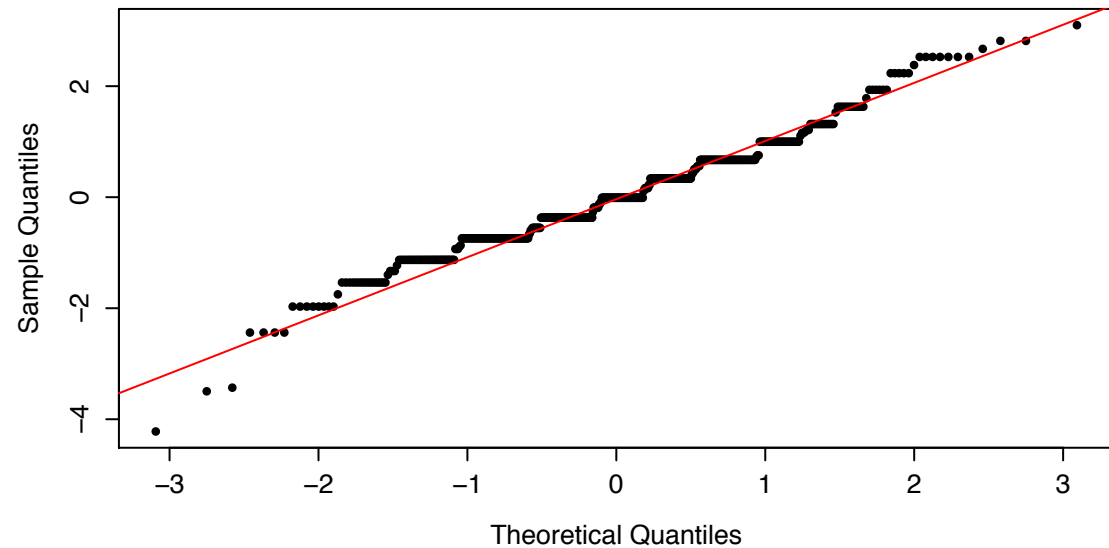

titratable acidity 2009 (N = 520)

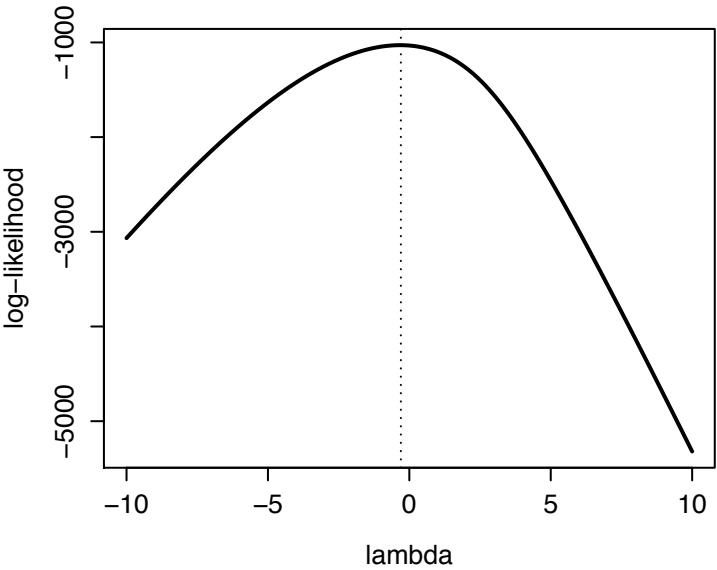

Untransformed

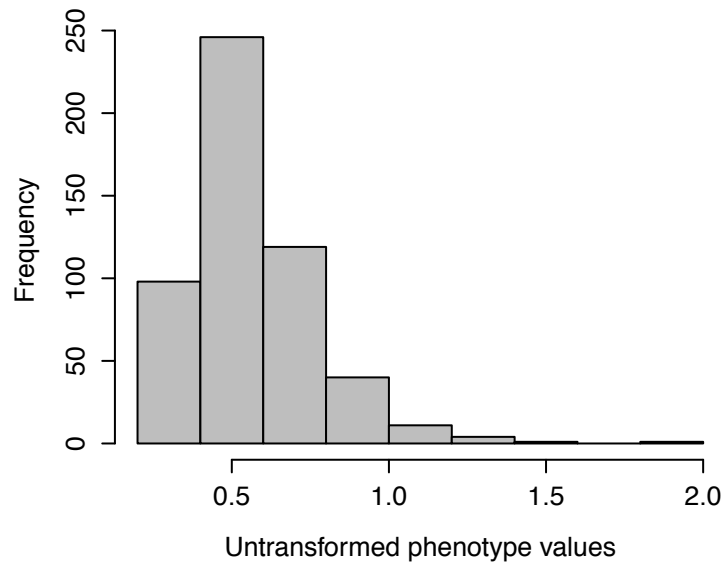

Transformed with lambda = -0.3

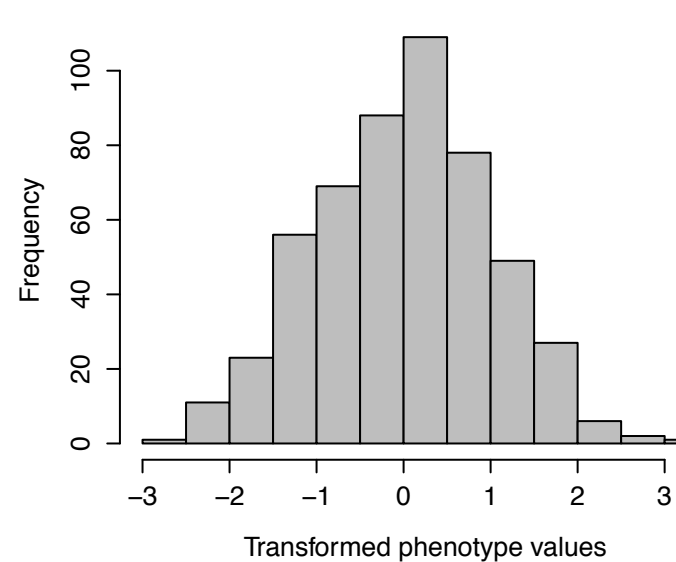

QQ plot untransformed

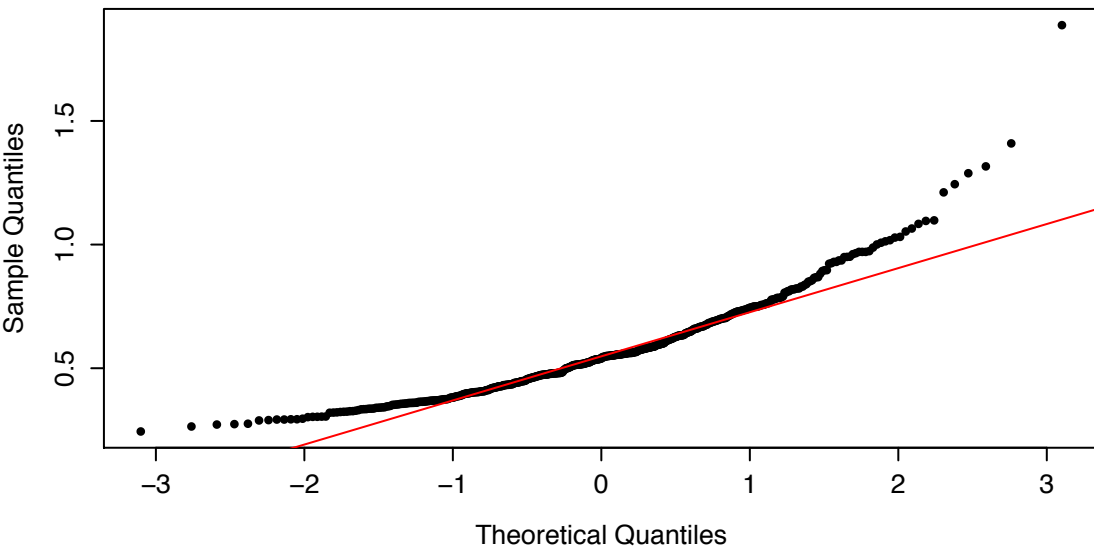

QQ plot transformed

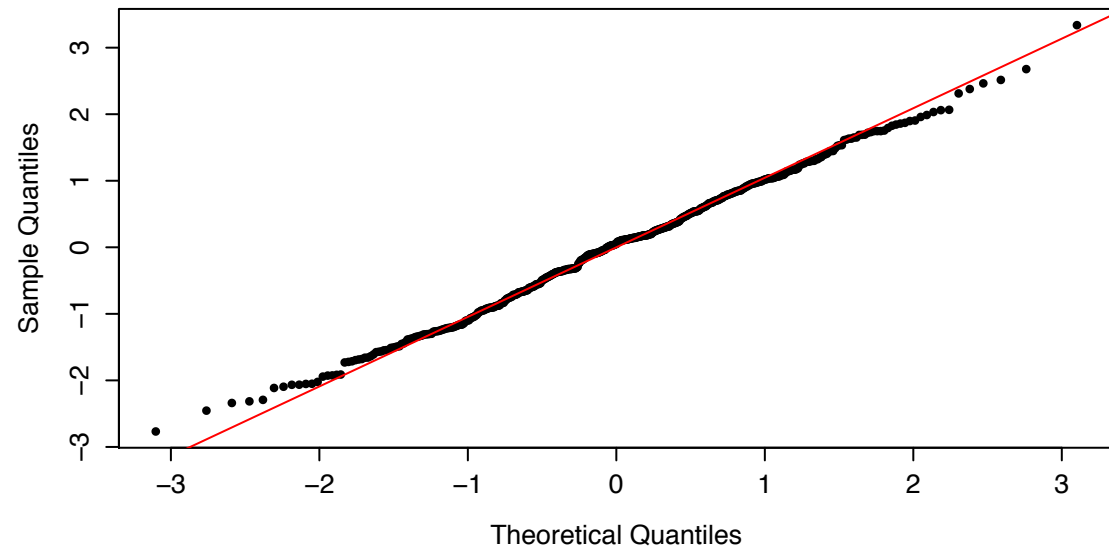

veraison 1993 (N = 179)

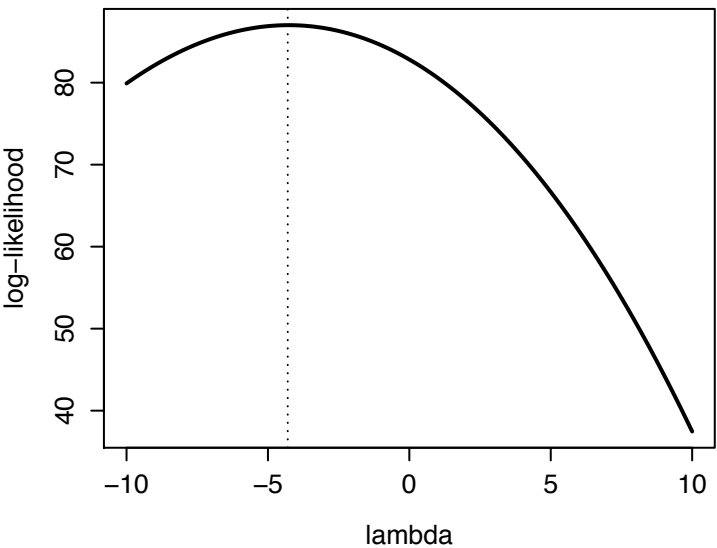

Untransformed

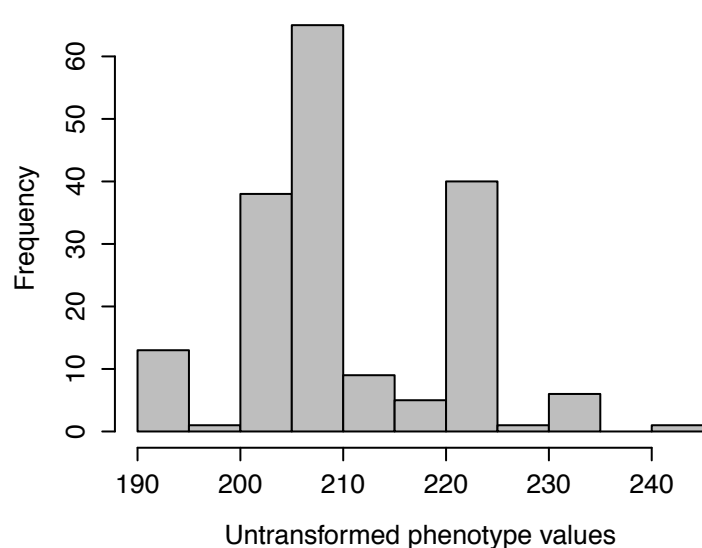

Transformed with lambda = -4.3

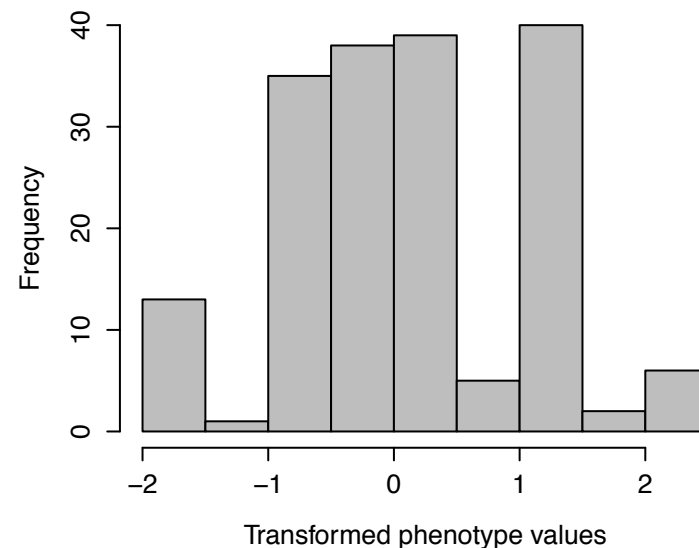

QQ plot untransformed

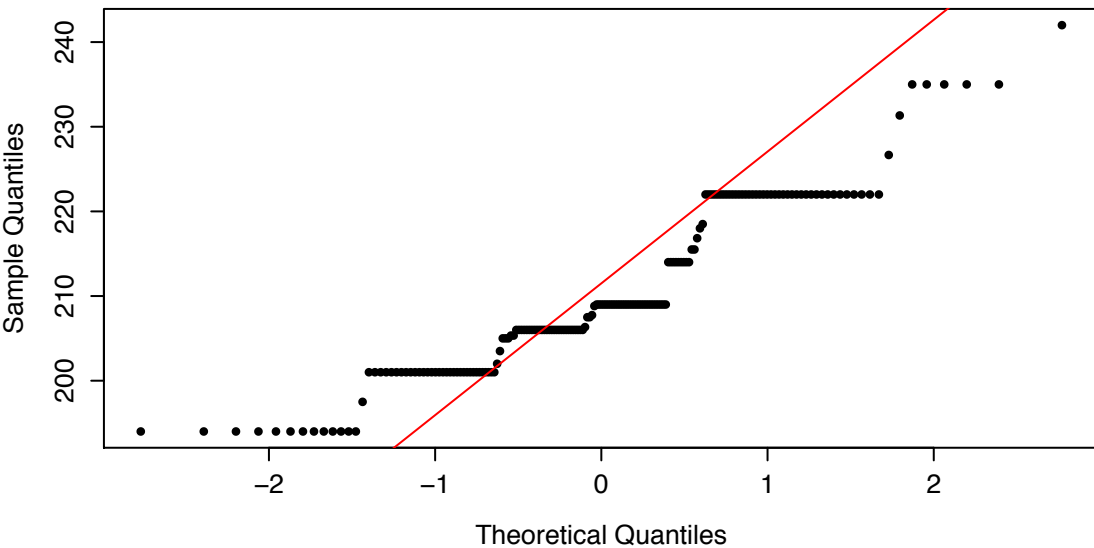

QQ plot transformed

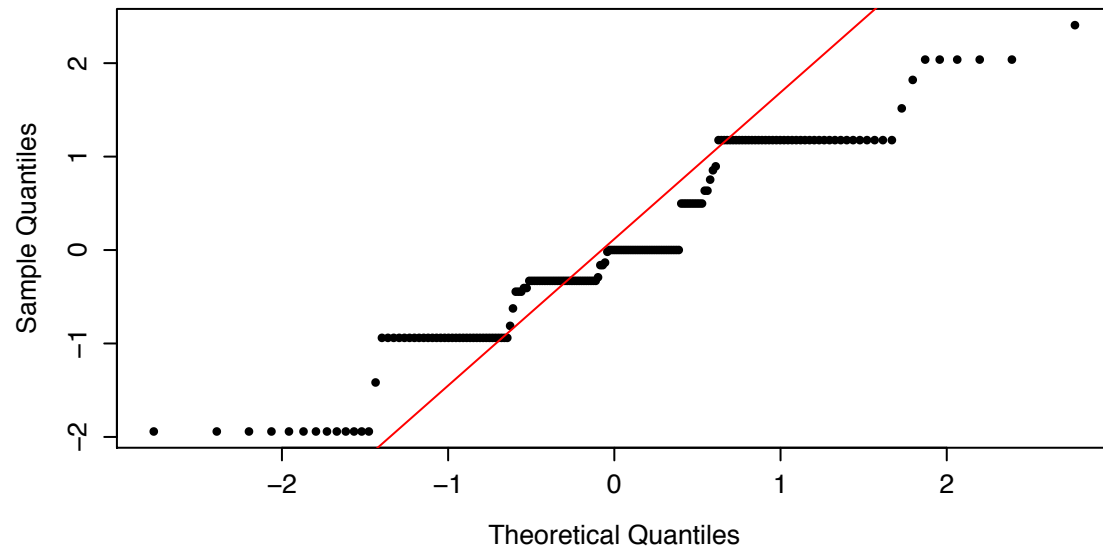

Supplement: hortres201735-s1.pdf [file hortres201735-s1.pdf]
