# Supplementary material for: Patterns of genomic and phenomic diversity in wine and table grapes
Source: PubMed Central journal article supplement (PMC5539807; doi:10.1038/hortres.2017.35), 2017-08-02

## berry firmness 2009 (N = 523)

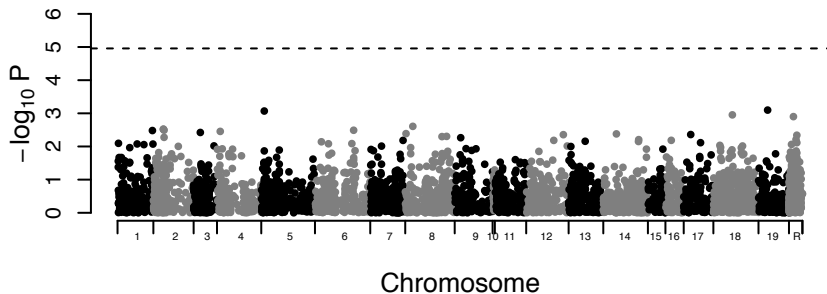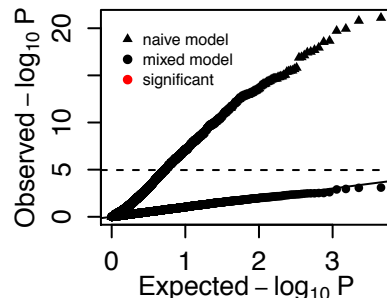

## berry length 2008 (N = 465)

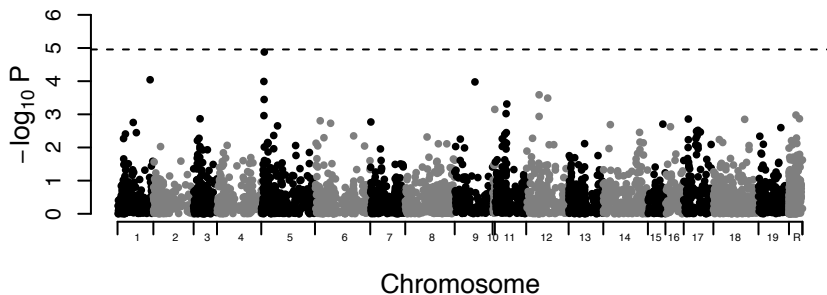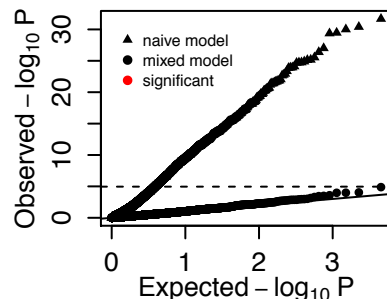

## berry shape 2008 (N = 465)

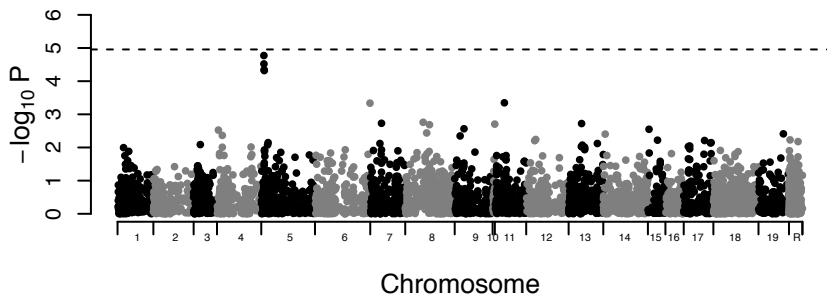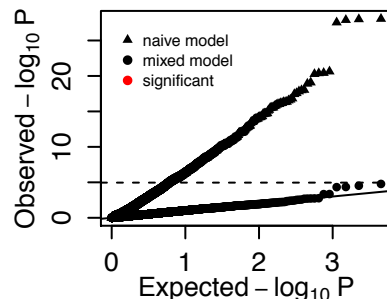

### berry size 2008 (N = 465)

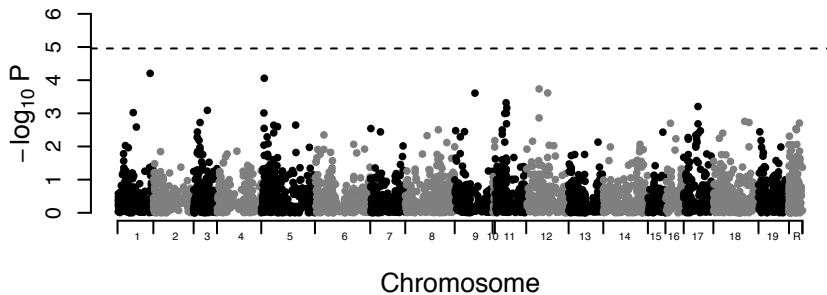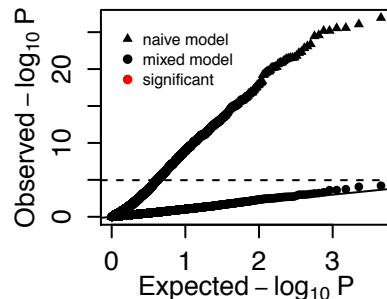

### berry weight 2009 (N = 476)

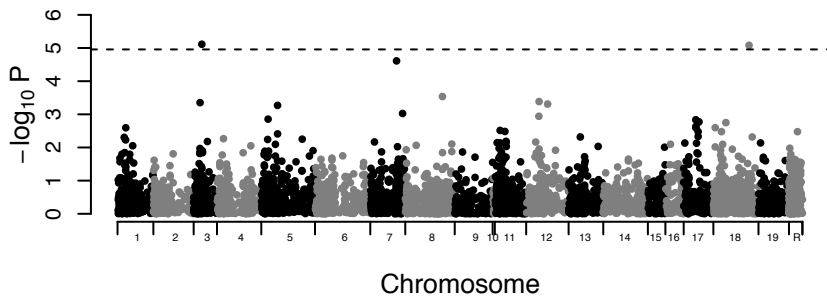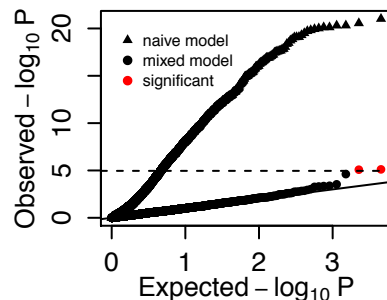

### berry width 2008 (N = 465)

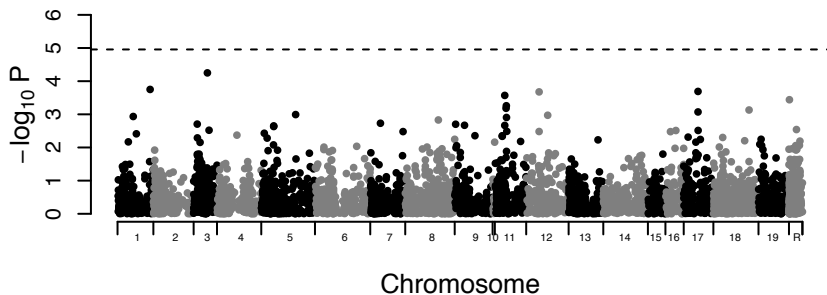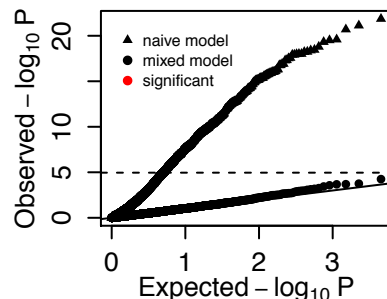

## cluster density 2008 (N = 454)

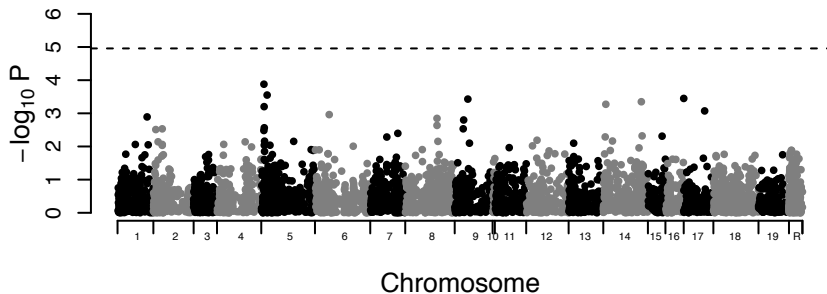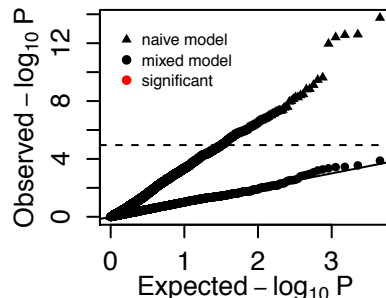

## cluster density 2009 (N = 519)

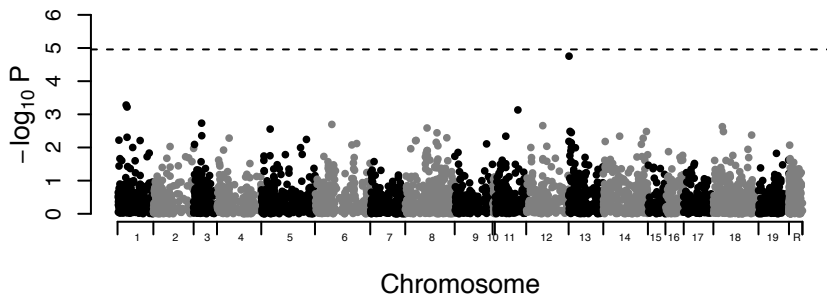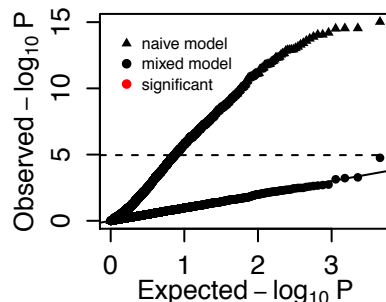

## cluster length 2009 (N = 521)

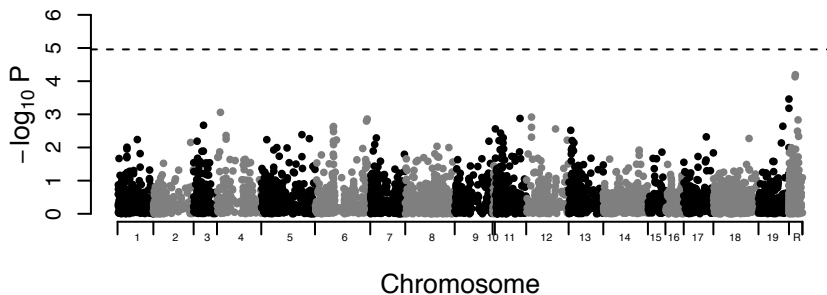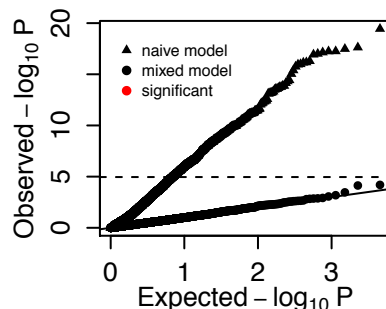

## cluster size 1992 (N = 152)

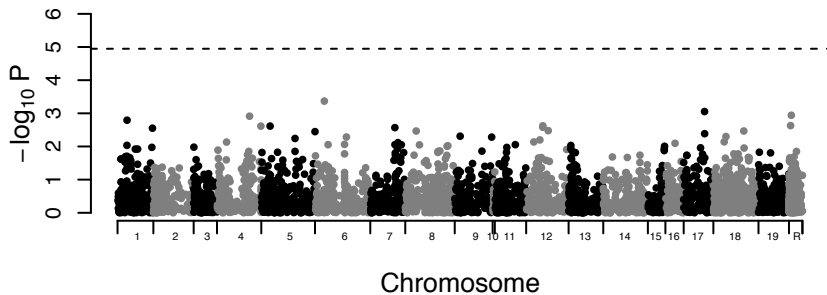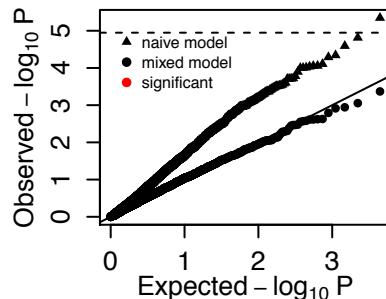

## cluster weight 2009 (N = 459)

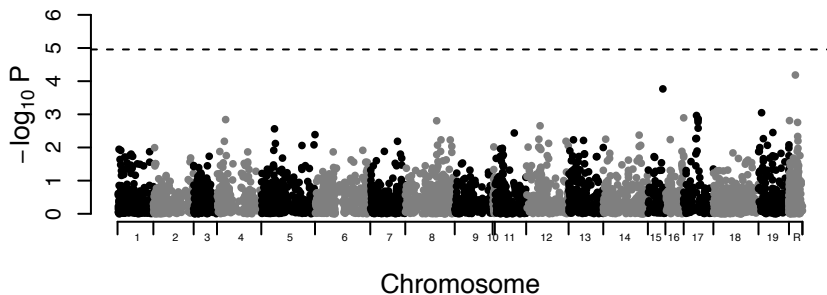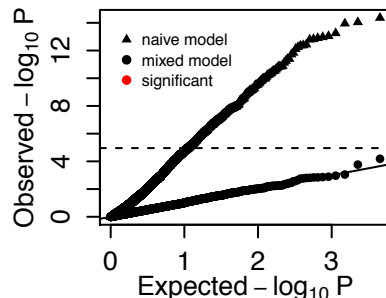

## cluster width 2009 (N = 523)

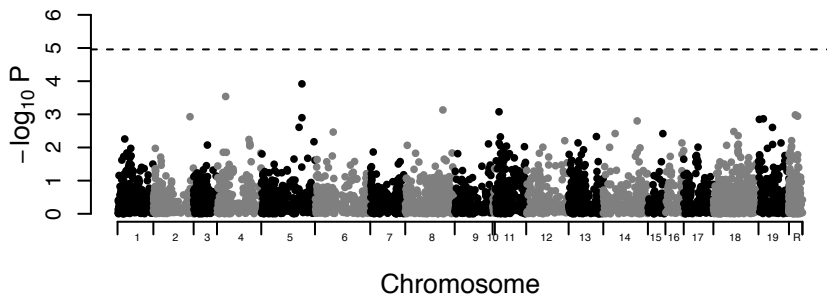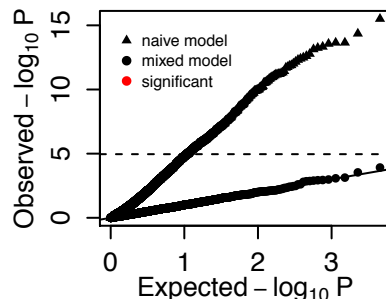

# field brix 1993 (N = 184)

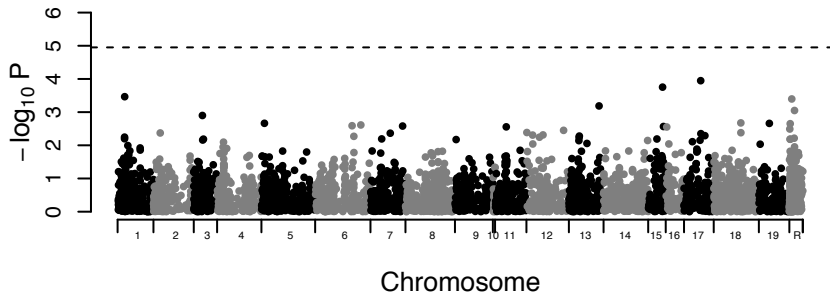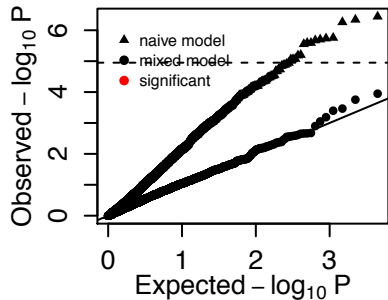

## lab brix 2009 (N = 521)

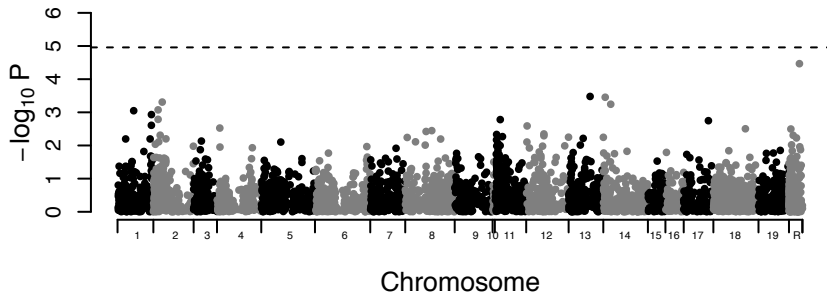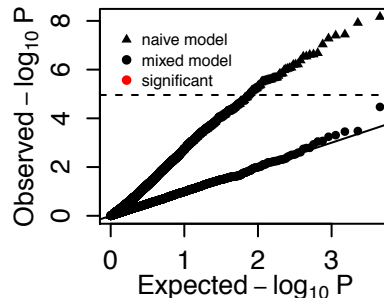

## muscat aroma 2009 (N = 519)

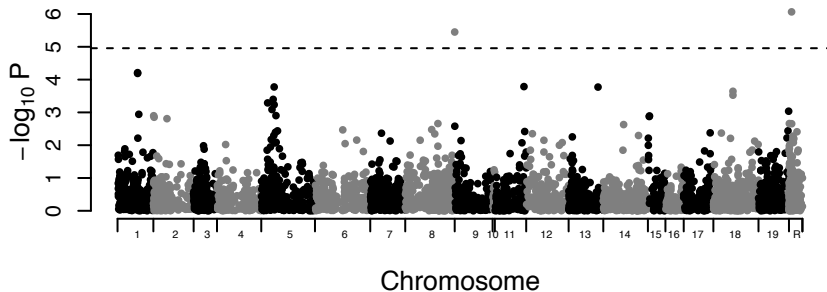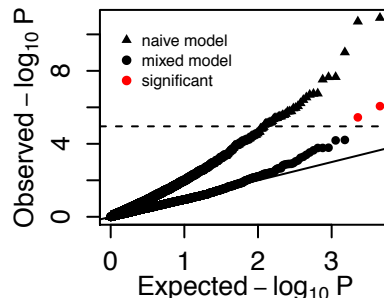

## seed number 2009 (N = 505)

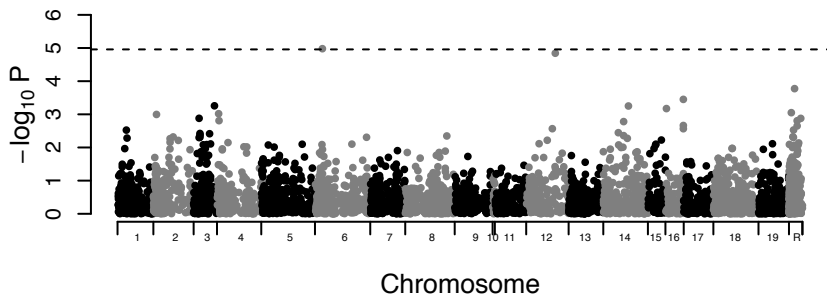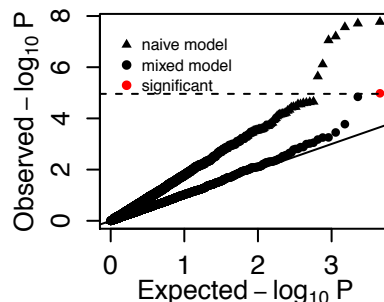

## seed weight 2009 (N = 504)

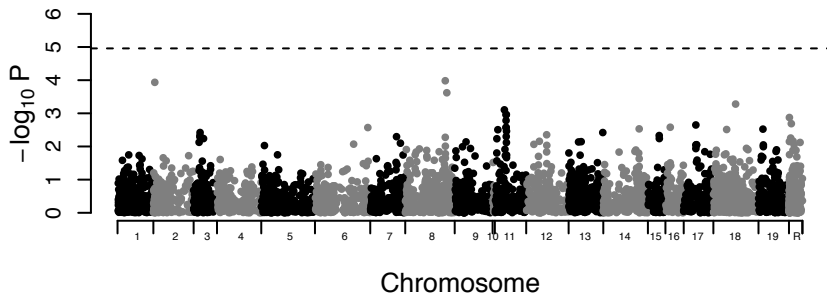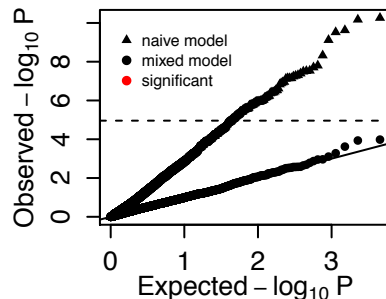

## seedlessness 1993 (N = 174)

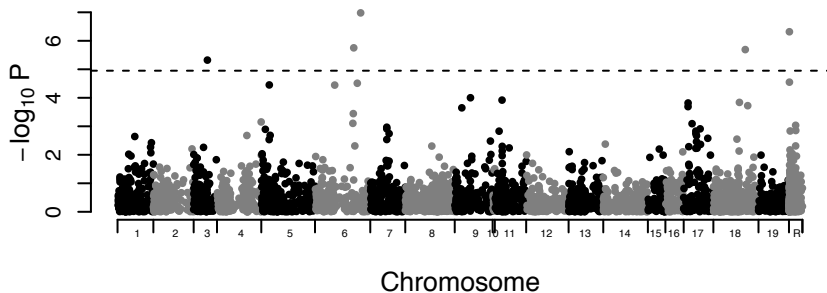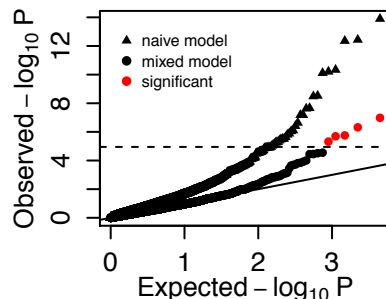

## skin color 2009 (N = 520)

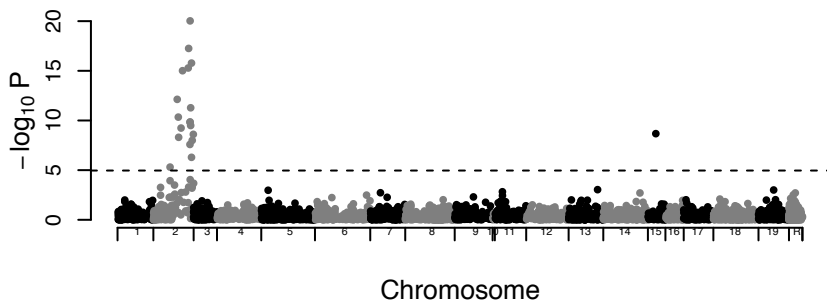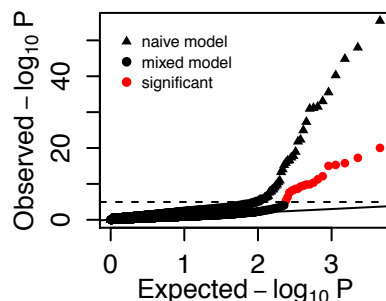

## titratable acidity 2009 (N = 520)

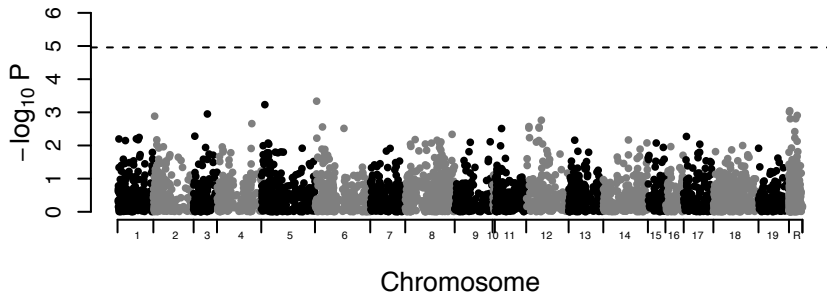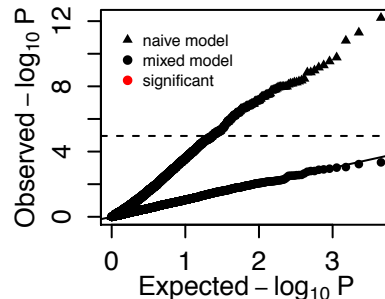

## bloom date 1996 (N = 453)

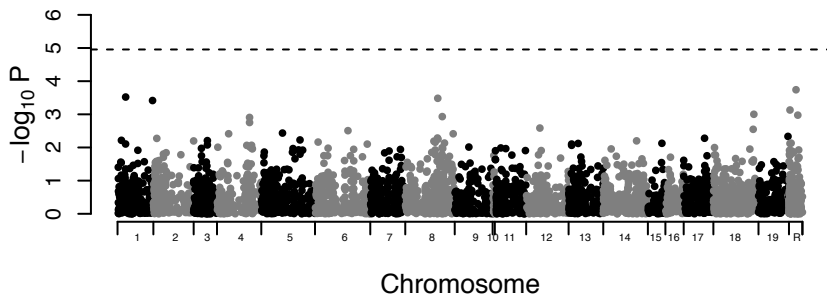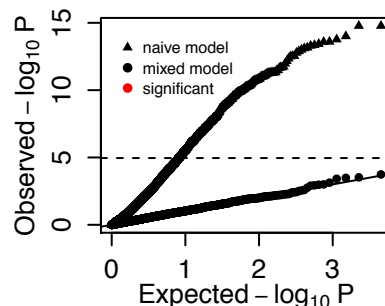

## bud burst date 1996 (N = 462)

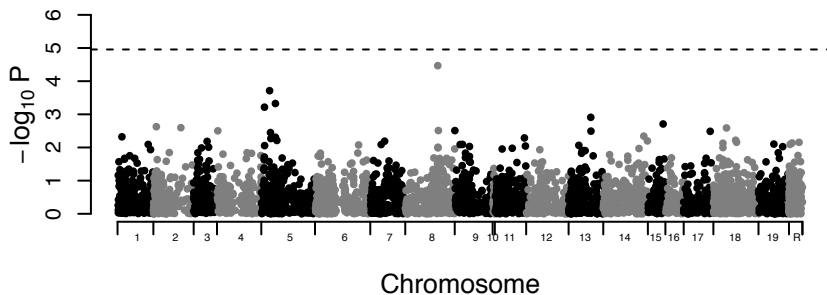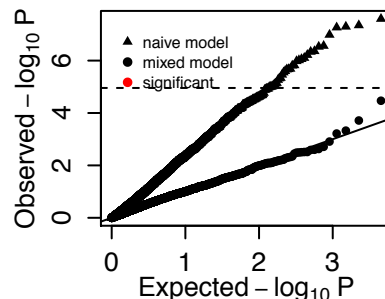



## bud burst date 2009 (N = 564)

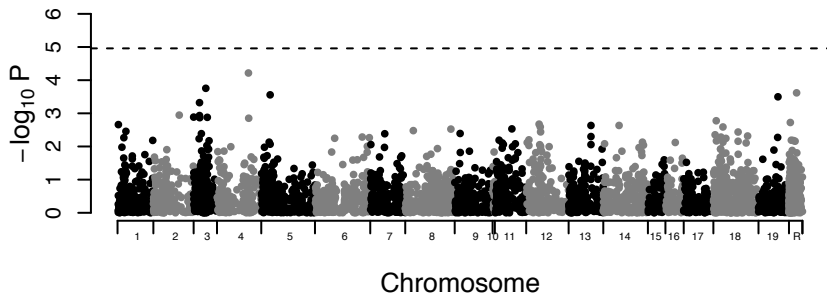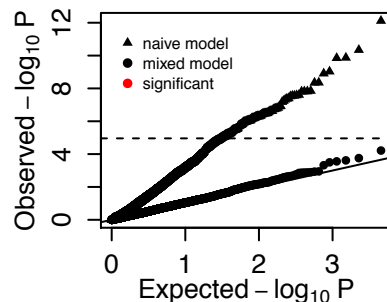

## leaf date 1996 (N = 459)

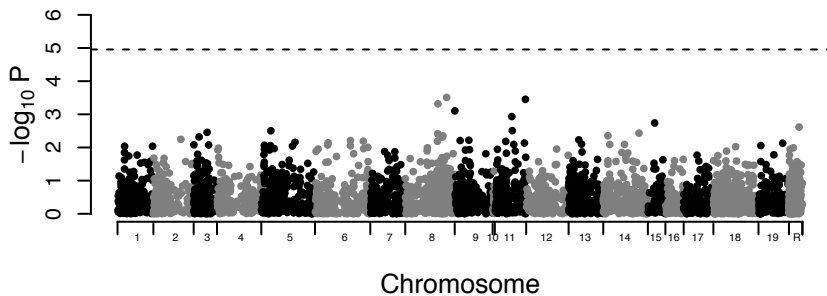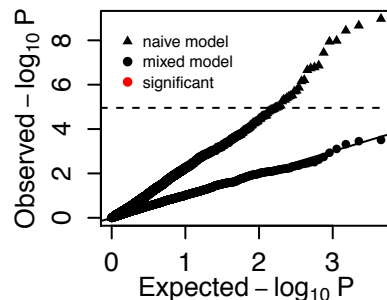

## veraison 1993 (N = 179)

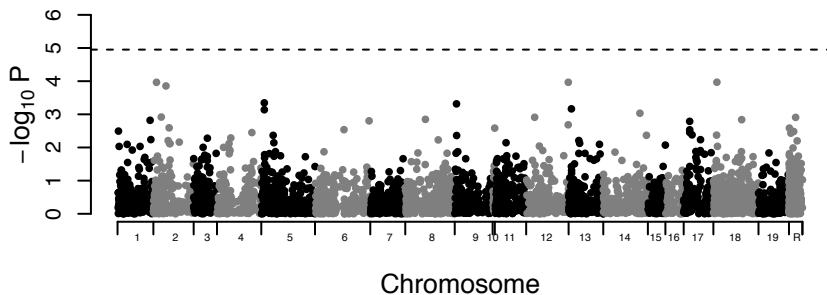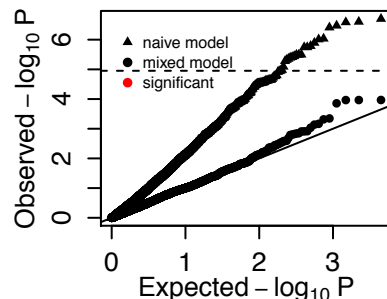

## first cluster node 2006 (N = 109)

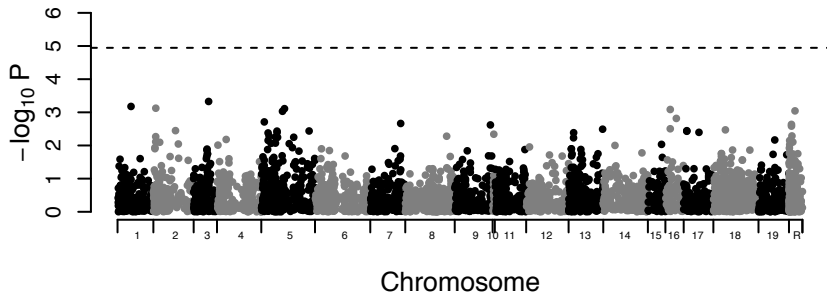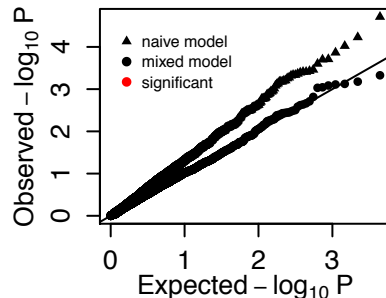

## flower sex 2010 (N = 550)

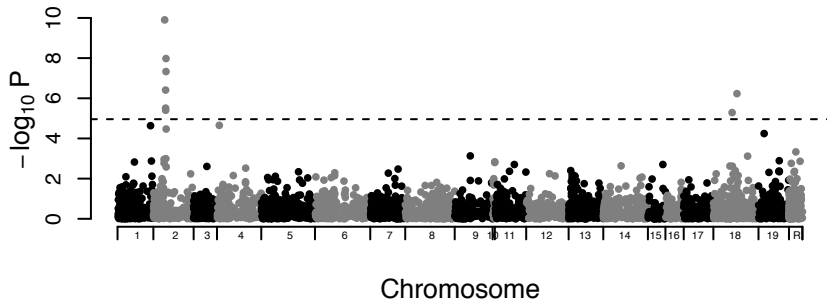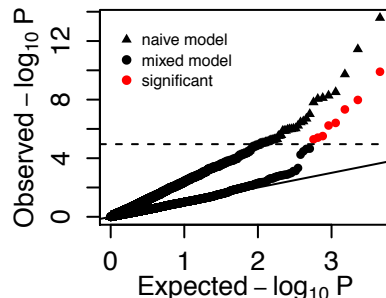

## leaf hair 1992 (N = 184)

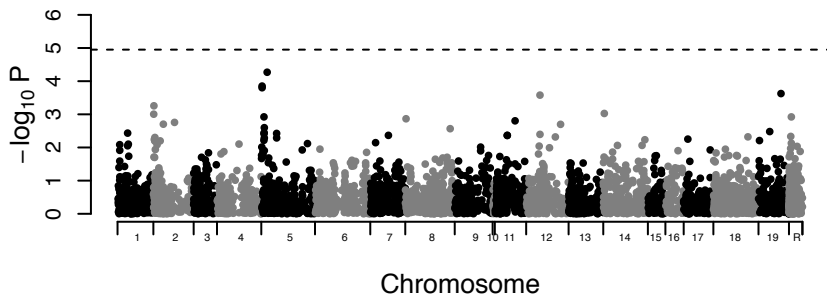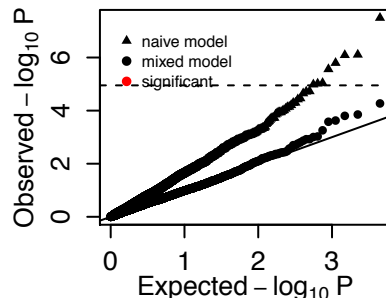

## leaf hair 1993 (N = 185)

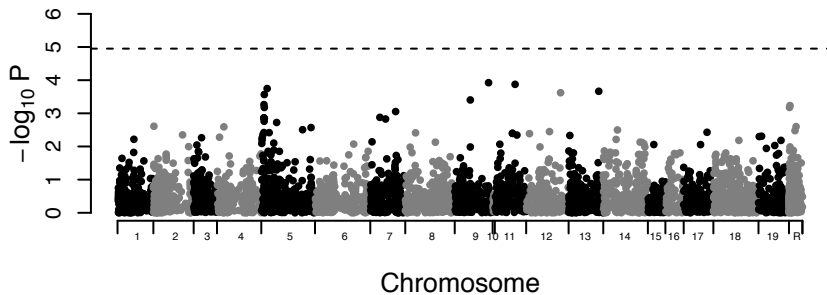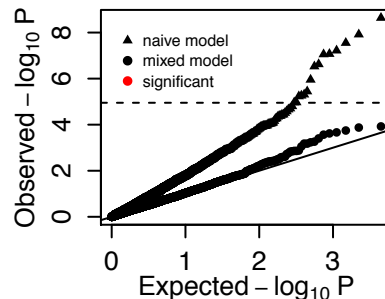

## leaf size 1992 (N = 185)

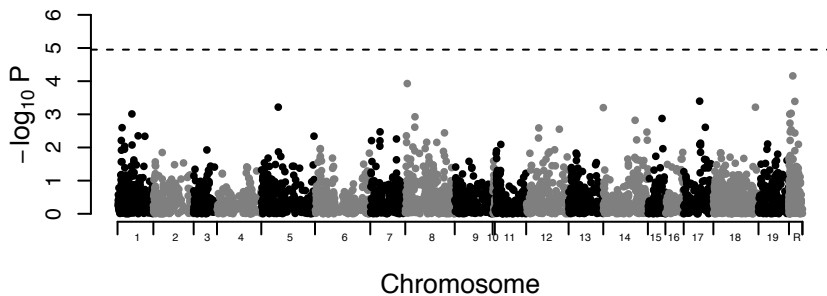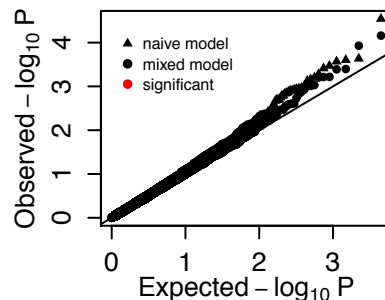

## leaf size 1993 (N = 185)

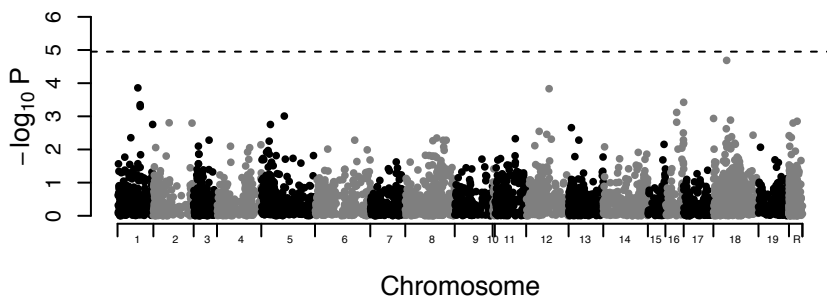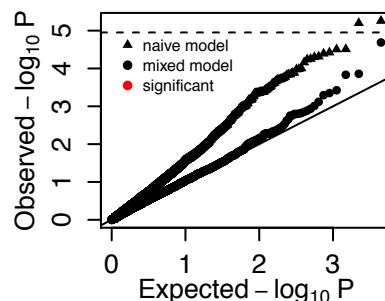

## naked vein 2009 (N = 558)

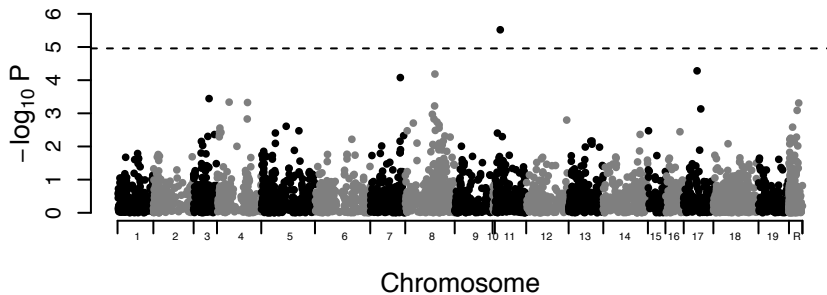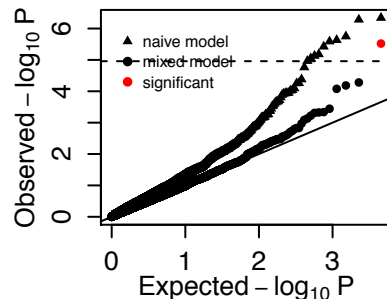

## peduncle length 2009 (N = 514)

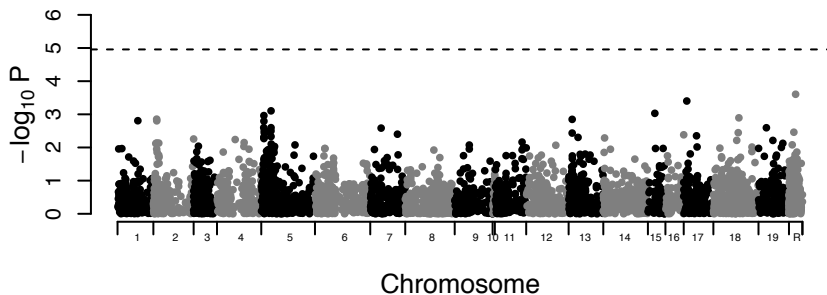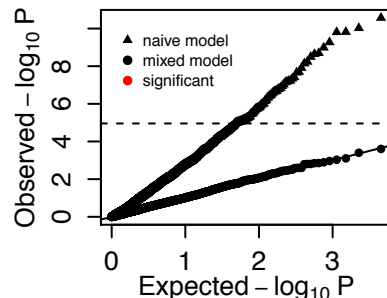

## petiolar sinus 2009 (N = 560)

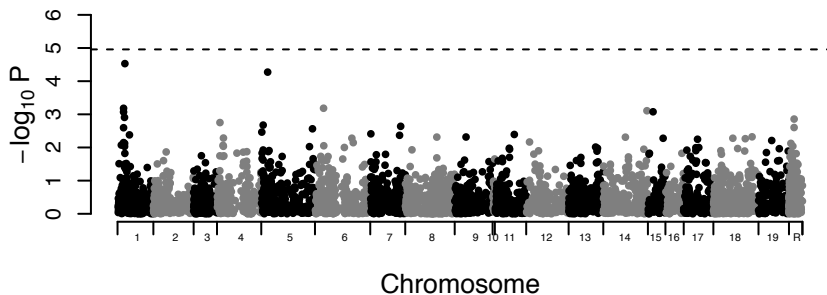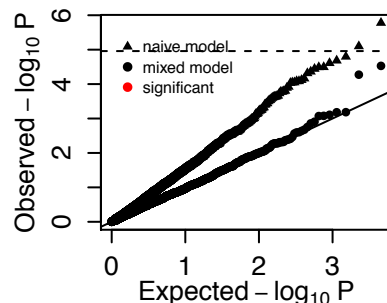

## shoot color intensity 1996 (N = 460)

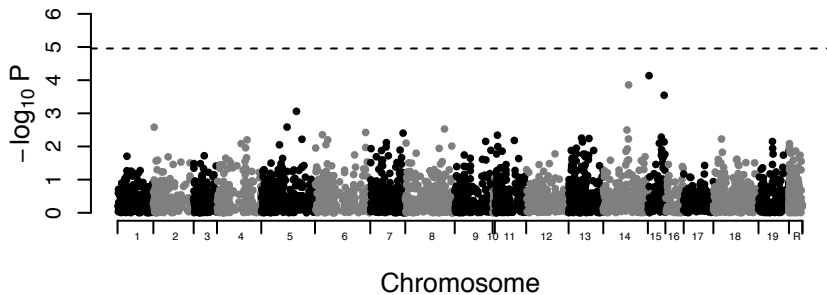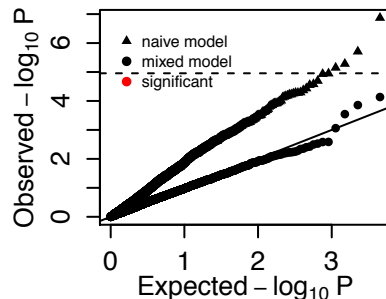

## shoot hair 1993 (N = 187)

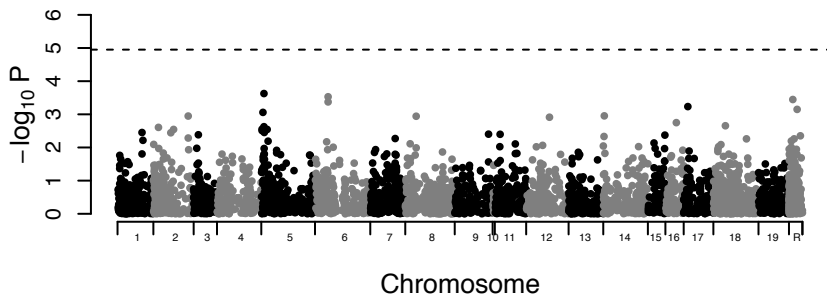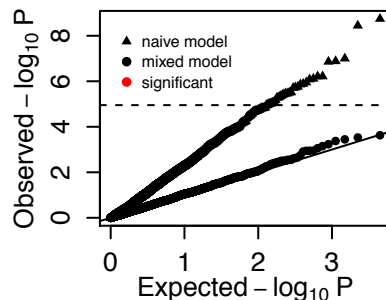

## tip anthocyanin 2009 (N = 502)

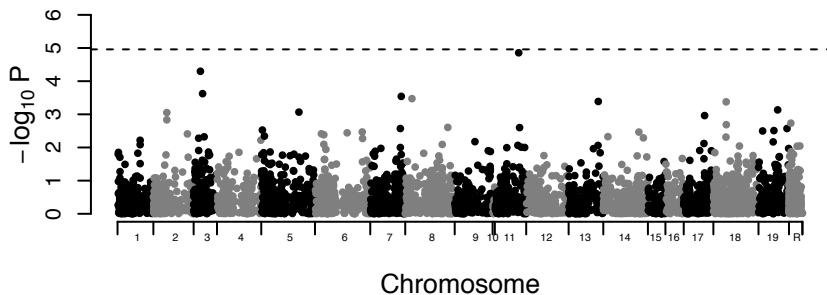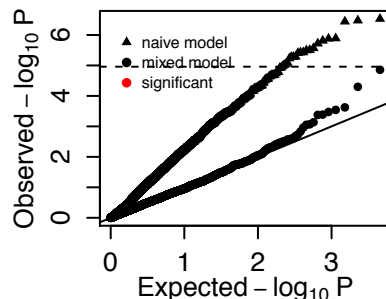

Supplement: hortres201735-s5.pdf [file hortres201735-s5.pdf]
