# Supplementary material for: Patterns of genomic and phenomic diversity in wine and table grapes
Source: PubMed Central journal article supplement (PMC5539807; doi:10.1038/hortres.2017.35), 2017-08-02

**first cluster node 2006 (N=109)**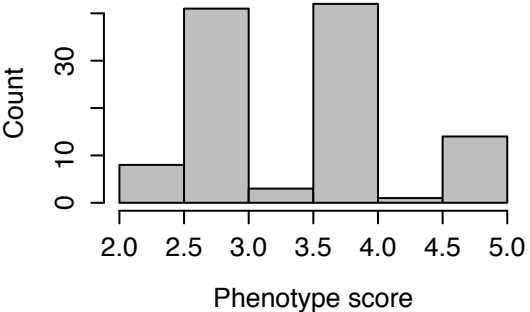**cluster density 2008 (N=454)**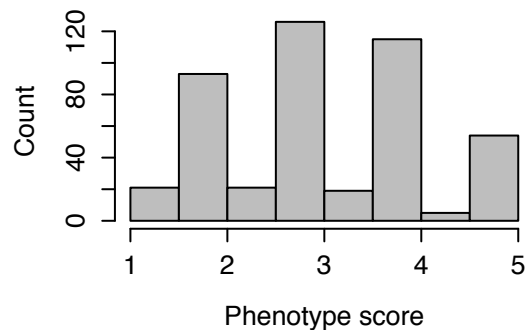**cluster density 2009 (N=519)**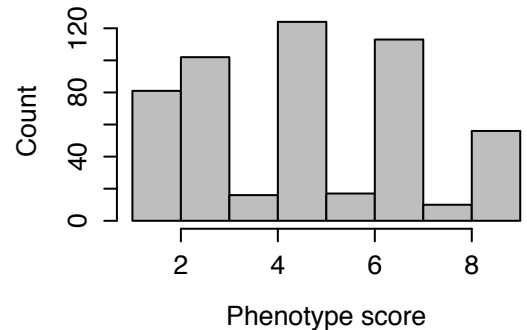**cluster size 1992 (N=152)**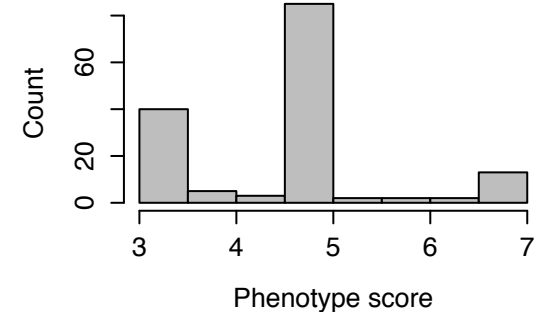**berry firmness 2009 (N=523)**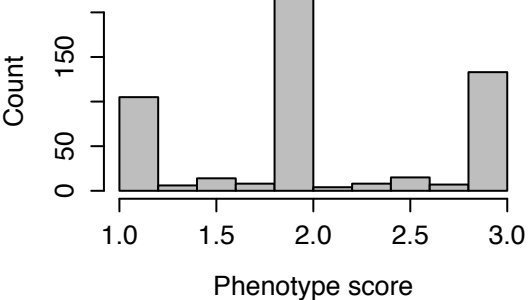**leaf hair 1992 (N=184)**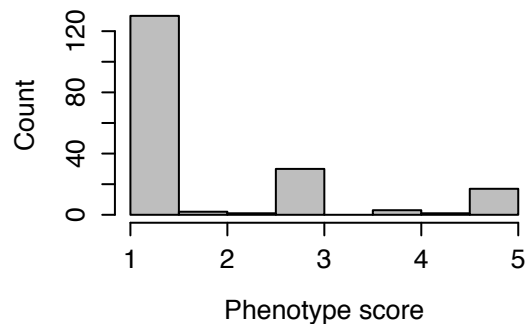**leaf hair 1993 (N=185)**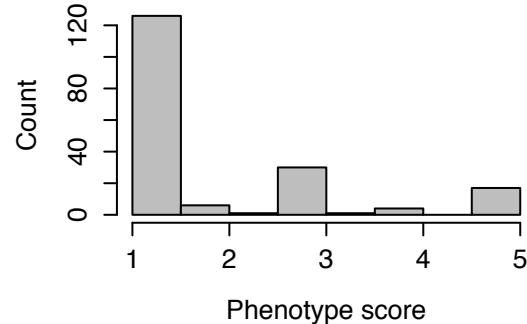**petiolar sinus 2009 (N=560)**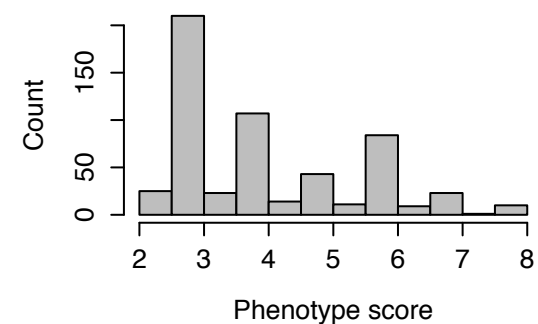**shoot hair 1993 (N=187)**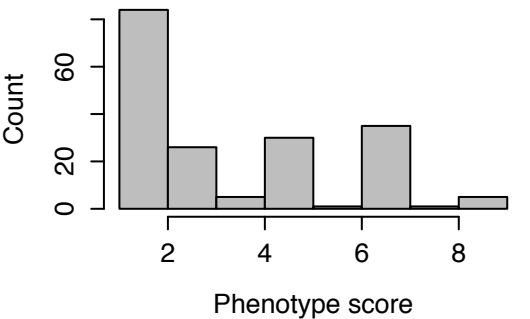**shoot color intensity 1996 (N=460)**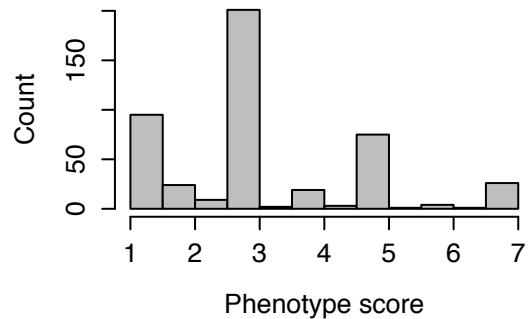**skin color 2009 (N=520)**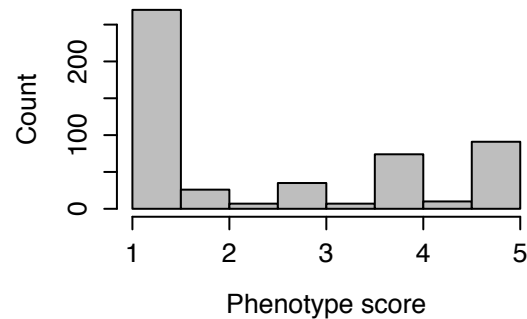**tip anthocyanin 2009 (N=502)**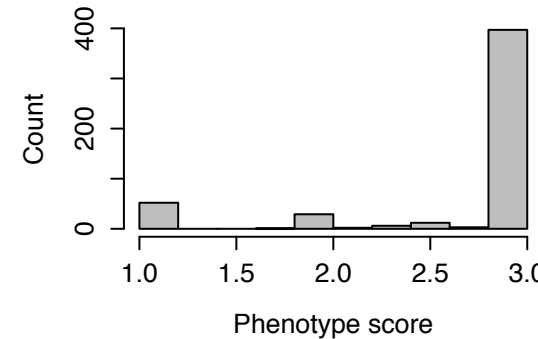

Supplement: hortres201735-s2.pdf [file hortres201735-s2.pdf]
