# Supplementary material for: Patterns of genomic and phenomic diversity in wine and table grapes
Source: PubMed Central journal article supplement (PMC5539807; doi:10.1038/hortres.2017.35), 2017-08-02

**muscat aroma 2009 (N=519)**

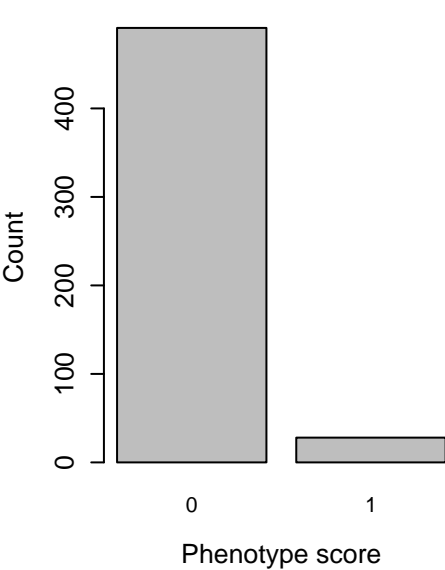

**flower sex 2010 (N=550)**

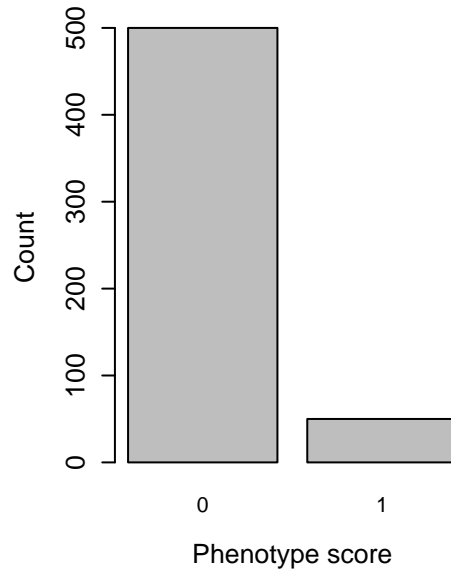

**leaf size 1992 (N=185)**

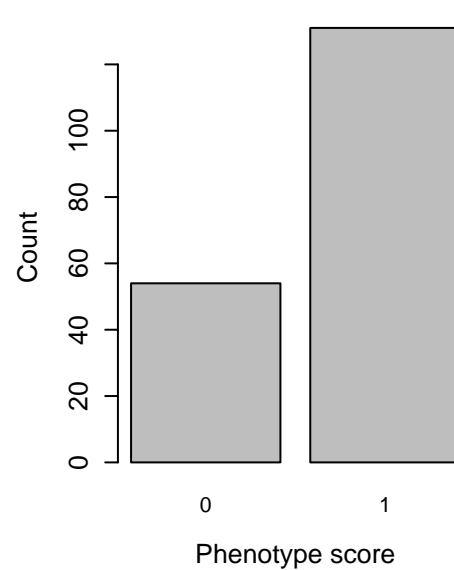

**leaf size 1993 (N=185)**

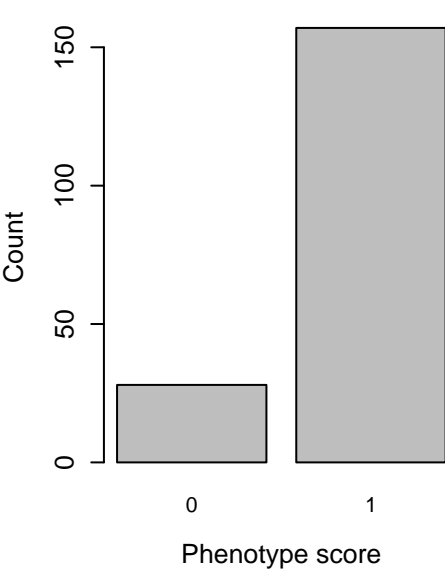

**naked vein 2009 (N=558)**

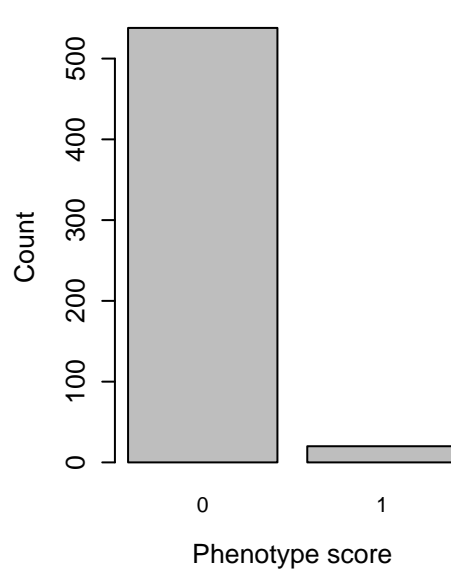

**seedlessness 1993 (N=174)**

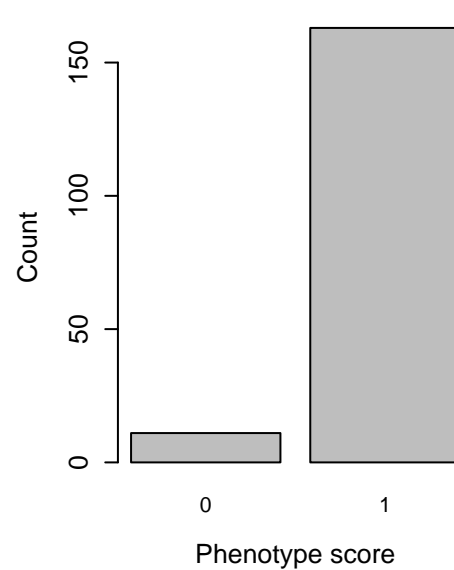

Supplement: hortres201735-s3.pdf [file hortres201735-s3.pdf]
