# Supplementary material for: Patterns of genomic and phenomic diversity in wine and table grapes
Source: PubMed Central journal article supplement (PMC5539807; doi:10.1038/hortres.2017.35), 2017-08-02

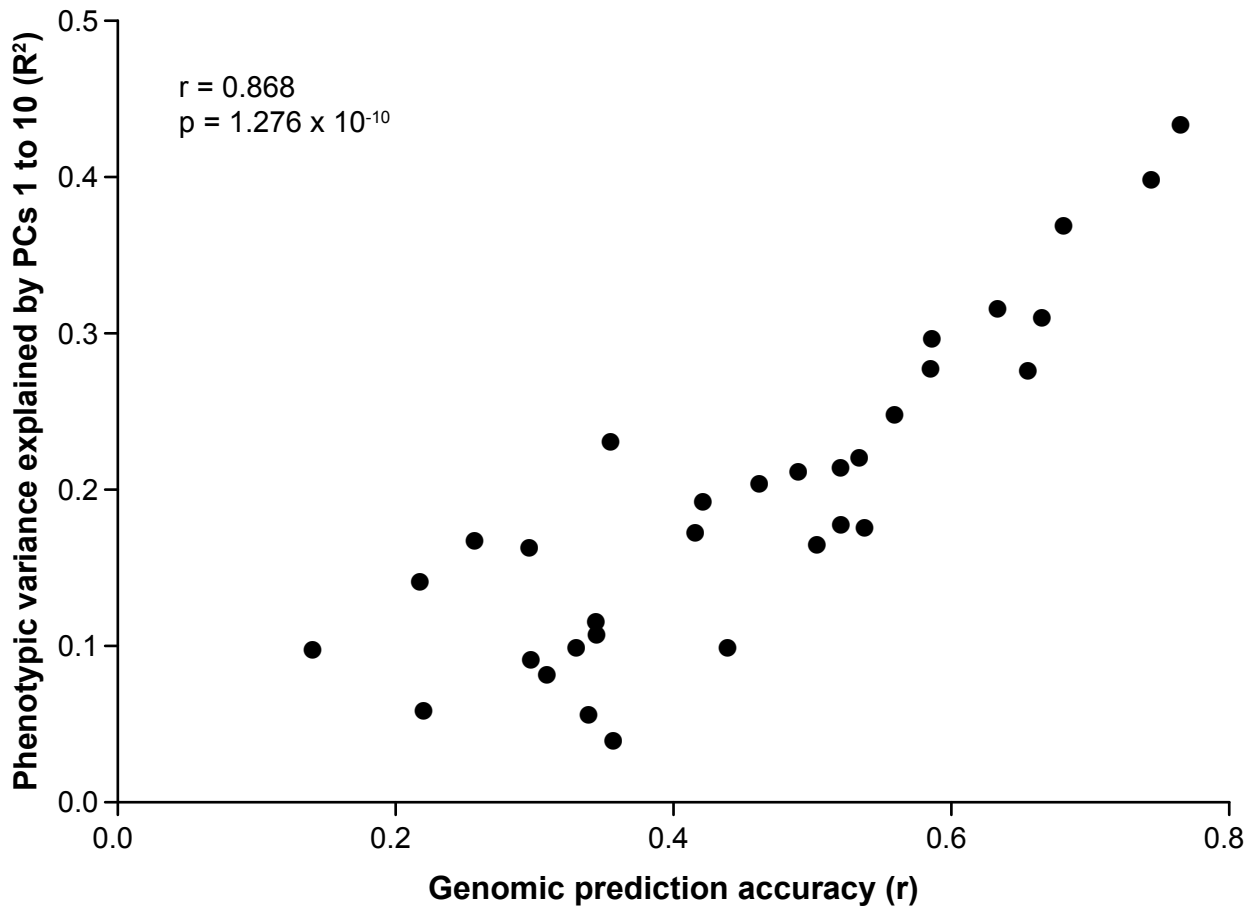

Supplement: hortres201735-s4.pdf [file hortres201735-s4.pdf]
